# Supplementary material for: The Suitability of RNA from Positive SARS-CoV-2 Rapid Antigen Tests for Whole Virus Genome Sequencing and Variant Identification to Maintain Genomic Surveillance
Source: MDPI journal article supplement (doi:10.3390/diagnostics13243618), 2023-12-07
Supplement: s1 [file s1]

Supplementary Table S1

| Month | Sample     | Valore CT | Lineage    | N_consensus | QC_status | Variante |
|-------|------------|-----------|------------|-------------|-----------|----------|
| June  | 3422036442 | 28,69     | Unassigned | 31,9        | Failed    | Omicron  |
| June  | 3422036565 | 28,54     | BA.2.9     | 23,9        | Failed    | Omicron2 |
| June  | 3422037224 | 28,46     | BE.1       | 16          | Failed    | Omicron5 |
| June  | 3422036803 | 28,29     | BA.2       | 22,3        | Failed    | Omicron2 |
| June  | 3422036568 | 28,14     | BA.4       | 27,8        | Failed    | Omicron2 |
| June  | 3422036562 | 28,11     | BA.4.1     | 24,6        | Failed    | Omicron4 |
| June  | 3422036560 | 28,04     | BA.2       | 22,8        | Failed    | Omicron2 |
| June  | 3422037209 | 27,93     | BA.5.1     | 12,1        | Failed    | Omicron5 |
| June  | 3422036610 | 27,9      | Unassigned | 34,2        | Failed    | Omicron  |
| June  | 3422036598 | 27,84     | Unassigned | 31,9        | Failed    | Omicron  |
| June  | 3422037230 | 27,63     | BA.2       | 13,7        | Failed    | Omicron2 |
| June  | 3422037225 | 27,62     | BE.1       | 8,7         | Failed    | Omicron5 |
| June  | 3422037217 | 27,55     | BA.5.1     | 9,5         | Failed    | Omicron5 |
| June  | 3422036877 | 27,43     | BA.2       | 19,5        | Failed    | Omicron2 |
| June  | 3422037222 | 27,43     | Unassigned | 34,5        | Failed    | Omicron  |
| June  | 3422036809 | 27,39     | BA.4       | 29,4        | Failed    | Omicron2 |
| June  | 3422036445 | 27,29     | BA.5.1     | 11,9        | Failed    | Omicron5 |
| June  | 3422036443 | 27,08     | BA.5       | 19,9        | Failed    | Omicron2 |
| June  | 3422037199 | 27,07     | BA.2.12.1  | 20,2        | Failed    | Omicron2 |
| June  | 3422036383 | 27,01     | BA.2       | 11,8        | Failed    | Omicron2 |
| June  | 3422036573 | 26,99     | BA.2.9     | 23,9        | Failed    | Omicron2 |
| June  | 3422036379 | 26,89     | BA.5.1.35  | 14,7        | Failed    | Omicron5 |
| June  | 3422037226 | 26,86     | BA.2.3.15  | 12,1        | Failed    | Omicron2 |
| June  | 3422036588 | 26,82     | BA.2       | 22,9        | Failed    | Omicron2 |
| June  | 3422037211 | 26,8      | BA.2.70    | 6,3         | Failed    | Omicron2 |
| June  | 3422037234 | 26,79     | BA.2.9     | 7,1         | Failed    | Omicron2 |
| June  | 3422036566 | 26,78     | BA.2       | 21,3        | Failed    | Omicron2 |
| June  | 3422036604 | 26,7      | BA.2       | 21,6        | Failed    | Omicron2 |
| June  | 3422036611 | 26,68     | BA.2       | 24,1        | Failed    | Omicron2 |
| June  | 3422036605 | 26,63     | BA.5       | 18          | Failed    | Omicron5 |
| June  | 3422036417 | 26,53     | BF.1       | 12,5        | Failed    | Omicron5 |
| June  | 3422036884 | 26,5      | BA.2       | 7,1         | Failed    | Omicron2 |
| June  | 3422036613 | 26,35     | BE.1       | 19,8        | Failed    | Omicron5 |
| June  | 3422037220 | 26,28     | BA.2       | 10          | Failed    | Omicron2 |
| June  | 3422036579 | 26,17     | BA.2       | 22,8        | Failed    | Omicron2 |
| June  | 3422036585 | 25,97     | BA.2       | 18,5        | Failed    | Omicron2 |
| June  | 3422036576 | 25,82     | BA.2.10    | 18,7        | Failed    | Omicron2 |
| June  | 3422036788 | 25,73     | BA.2.10    | 4,8         | Passed    | Omicron2 |
| June  | 3422036813 | 25,71     | BA.2       | 16,2        | Failed    | Omicron2 |
| June  | 3422037241 | 25,67     | BA.2       | 6,2         | Failed    | Omicron2 |
| June  | 3422036583 | 25,3      | BA.2       | 13,9        | Failed    | Omicron2 |
| June  | 3422036609 | 25,27     | BA.5.1     | 15,9        | Failed    | Omicron5 |
| June  | 3422036577 | 25,17     | BA.2       | 15,4        | Failed    | Omicron2 |
| June  | 3422036602 | 25,14     | BA.2.3.15  | 14,2        | Failed    | Omicron2 |
| June  | 3422036896 | 25,1      | BA.5.1     | 9,1         | Failed    | Omicron5 |
| June  | 3422036785 | 25        | BA.2       | 10,2        | Failed    | Omicron2 |
| June  | 3422037213 | 24,88     | BA.5.1     | 7,4         | Failed    | Omicron5 |
| June  | 3422036806 | 24,75     | BA.5.1     | 3,8         | Passed    | Omicron5 |
| June  | 3422037205 | 24,74     | BA.2.13    | 4,3         | Passed    | Omicron2 |
| June  | 3422036388 | 24,64     | BA.5.1     | 7,5         | Failed    | Omicron5 |
| June  | 3422036596 | 24,56     | BA.2       | 12,9        | Failed    | Omicron2 |
| June  | 3422036584 | 24,36     | BA.2       | 13,6        | Failed    | Omicron2 |
| June  | 3422036370 | 24,21     | BA.4       | 6,7         | Failed    | Omicron4 |
| June  | 3422036903 | 24,15     | BA.5.1     | 2,8         | Passed    | Omicron5 |

|      |            |       |           |      |        |          |
|------|------------|-------|-----------|------|--------|----------|
| June | 3422036789 | 24,1  | BE.1      | 2,7  | Passed | Omicron5 |
| June | 3422036589 | 24,04 | BA.2      | 7,3  | Failed | Omicron2 |
| June | 3422036580 | 23,93 | BA.2      | 7,7  | Failed | Omicron2 |
| June | 3422036414 | 23,86 | BA.4      | 19   | Failed | Omicron4 |
| June | 3422036882 | 23,86 | BA.2.12.1 | 2,9  | Passed | Omicron2 |
| June | 3422037235 | 23,78 | BA.4      | 3,2  | Passed | Omicron4 |
| June | 3422036452 | 23,76 | BA.5.1.1  | 5,6  | Failed | Omicron5 |
| June | 3422038513 | 23,7  | BA.4.1    | 6,3  | Failed | Omicron4 |
| June | 3422036590 | 23,67 | BA.2.52   | 7,4  | Failed | Omicron2 |
| June | 3422036430 | 23,61 | BA.2      | 5,8  | Failed | Omicron2 |
| June | 3422036380 | 23,58 | BA.5.1    | 8,7  | Failed | Omicron5 |
| June | 3422036375 | 23,56 | BA.2.52   | 2,7  | Passed | Omicron2 |
| June | 3422036886 | 23,53 | BE.1      | 2,9  | Passed | Omicron5 |
| June | 3422037215 | 23,45 | BA.2      | 1,9  | Passed | Omicron2 |
| June | 3422036403 | 23,41 | BA.5.1    | 9,4  | Failed | Omicron5 |
| June | 3422036582 | 23,32 | BA.5.1    | 8,2  | Failed | Omicron5 |
| June | 3422036887 | 23,32 | BA.5.1    | 6,6  | Failed | Omicron5 |
| June | 3422036593 | 23,31 | BA.5.1    | 8,2  | Failed | Omicron5 |
| June | 3422036898 | 23,09 | BA.5.1    | 4,1  | Passed | Omicron5 |
| June | 3422037202 | 23,02 | BA.2      | 1,2  | Passed | Omicron2 |
| June | 3422037221 | 22,99 | BA.2      | 1,9  | Passed | Omicron2 |
| June | 3422038523 | 22,98 | BA.5.1    | 5,5  | Failed | Omicron5 |
| June | 3422036406 | 22,81 | BA.2      | 3,7  | Passed | Omicron2 |
| June | 3422037204 | 22,77 | BA.2      | 2,5  | Passed | Omicron2 |
| June | 3422037207 | 22,77 | BA.2      | 4,7  | Passed | Omicron2 |
| June | 3422037239 | 22,62 | BA.5.1    | 1,5  | Passed | Omicron5 |
| June | 3422037210 | 22,55 | BA.5.1    | 1,3  | Passed | Omicron5 |
| June | 3422036446 | 22,48 | BA.5.1    | 6,2  | Failed | Omicron5 |
| June | 3422036895 | 22,48 | BA.4      | 0,8  | Passed | Omicron4 |
| June | 3422036569 | 22,43 | BA.5.1.1  | 5,3  | Failed | Omicron5 |
| June | 3422036434 | 22,35 | BA.5.1.24 | 3,5  | Passed | Omicron5 |
| June | 3422037203 | 22,04 | BA.2.3.15 | 0,6  | Passed | Omicron2 |
| June | 3422037232 | 21,9  | BA.2      | 1,6  | Passed | Omicron2 |
| June | 3422036571 | 21,81 | BA.4      | 4,7  | Passed | Omicron4 |
| June | 3422036372 | 21,79 | BA.2.9    | 4    | Passed | Omicron2 |
| June | 3422036592 | 21,75 | BA.2.3.15 | 5,1  | Failed | Omicron2 |
| June | 3422037216 | 21,75 | BA.5.1    | 1,2  | Passed | Omicron5 |
| June | 3422036811 | 21,71 | BA.2.9    | 1,3  | Passed | Omicron2 |
| June | 3422036597 | 21,68 | BA.2.54   | 4,8  | Passed | Omicron2 |
| June | 3422037260 | 21,65 | BA.2.13   | 1,3  | Passed | Omicron2 |
| June | 3422037227 | 21,54 | BA.2      | 6,4  | Failed | Omicron2 |
| June | 3422036448 | 21,37 | BA.2.70   | 3,2  | Passed | Omicron2 |
| June | 3422036401 | 21,36 | BA.5.1.2  | 0,6  | Passed | Omicron5 |
| June | 3422036790 | 21,34 | BA.2.23   | 4,9  | Passed | Omicron2 |
| June | 3422036816 | 21,28 | BA.2.9    | 0,9  | Passed | Omicron2 |
| June | 3422036570 | 21,25 | BA.2      | 3,3  | Passed | Omicron2 |
| June | 3422036595 | 21,22 | BA.5.1    | 3,8  | Passed | Omicron5 |
| June | 3422036587 | 21,2  | BA.2.3    | 3,4  | Passed | Omicron2 |
| June | 3422036586 | 21,13 | BA.5.1    | 3,4  | Passed | Omicron5 |
| June | 3422036869 | 21,06 | BA.2      | 1,4  | Passed | Omicron2 |
| June | 3422037219 | 21,06 | BA.5.1.3  | 2,2  | Passed | Omicron5 |
| June | 3422037236 | 20,97 | BA.2      | 0,8  | Passed | Omicron2 |
| June | 3422036804 | 20,9  | BA.5.1    | 1,8  | Passed | Omicron5 |
| June | 3422038502 | 20,87 | BA.2      | 25,6 | Failed | Omicron2 |
| June | 3422036897 | 20,84 | BA.5.1    | 1,5  | Passed | Omicron5 |
| June | 3422036428 | 20,82 | BA.2.44   | 2,2  | Passed | Omicron2 |

|      |            |       |           |     |        |          |
|------|------------|-------|-----------|-----|--------|----------|
| June | 3422037246 | 20,75 | BA.2      | 1   | Passed | Omicron2 |
| June | 3422036601 | 20,73 | BA.2.9    | 3,8 | Passed | Omicron2 |
| June | 3422036394 | 20,72 | BA.5.1    | 1   | Passed | Omicron5 |
| June | 3422036815 | 20,69 | BA.2      | 0,2 | Passed | Omicron2 |
| June | 3422037266 | 20,67 | BA.2.56   | 1,1 | Passed | Omicron2 |
| June | 3422036399 | 20,55 | BA.2      | 1,8 | Passed | Omicron2 |
| June | 3422036800 | 20,54 | BA.5.1    | 0,9 | Passed | Omicron5 |
| June | 3422036412 | 20,48 | BA.5.1    | 0,7 | Passed | Omicron5 |
| June | 3422037250 | 20,46 | BA.2.3.15 | 0,9 | Passed | Omicron2 |
| June | 3422036603 | 20,45 | BA.2      | 1,5 | Passed | Omicron2 |
| June | 3422036395 | 20,34 | BA.5.1    | 0,3 | Passed | Omicron5 |
| June | 3422037228 | 20,33 | BA.2      | 0,9 | Passed | Omicron2 |
| June | 3422036572 | 20,31 | BA.2      | 0,6 | Passed | Omicron2 |
| June | 3422036382 | 20,1  | BA.2      | 1   | Passed | Omicron2 |
| June | 3422036814 | 20,1  | BA.2.10   | 0,5 | Passed | Omicron2 |
| June | 3422036866 | 20,08 | BA.2      | 0,8 | Passed | Omicron2 |
| June | 3422036575 | 20,05 | BA.2      | 1,7 | Passed | Omicron2 |
| June | 3422036439 | 19,84 | BA.5.1    | 1,8 | Passed | Omicron5 |
| June | 3422036904 | 19,82 | BA.5.1    | 0,3 | Passed | Omicron5 |
| June | 3422036784 | 19,81 | BA.2      | 0,2 | Passed | Omicron2 |
| June | 3422036787 | 19,68 | BA.2.9    | 1   | Passed | Omicron2 |
| June | 3422036893 | 19,67 | BA.2.9    | 0,3 | Passed | Omicron2 |
| June | 3422036880 | 19,65 | BA.5.1.2  | 0,8 | Passed | Omicron5 |
| June | 3422036441 | 19,61 | BA.2      | 1,1 | Passed | Omicron2 |
| June | 3422038512 | 19,59 | BA.2      | 0,8 | Passed | Omicron2 |
| June | 3422036390 | 19,57 | BA.2      | 0,7 | Passed | Omicron2 |
| June | 3422036429 | 19,56 | BA.2.10   | 0,6 | Passed | Omicron2 |
| June | 3422037248 | 19,39 | BA.2      | 0,8 | Passed | Omicron2 |
| June | 3422036864 | 19,31 | BA.4      | 0   | Passed | Omicron4 |
| June | 3422036599 | 19,3  | BA.2      | 2   | Passed | Omicron2 |
| June | 3422036792 | 19,28 | BA.2      | 0,4 | Passed | Omicron2 |
| June | 3422036883 | 19,24 | BA.2      | 0,2 | Passed | Omicron2 |
| June | 3422036386 | 19,14 | BA.2      | 0,4 | Passed | Omicron2 |
| June | 3422036591 | 19,12 | BA.5.1    | 0,6 | Passed | Omicron5 |
| June | 3422036377 | 18,94 | BA.2.9    | 0,4 | Passed | Omicron2 |
| June | 3422036798 | 18,83 | BA.2.9    | 0,4 | Passed | Omicron2 |
| June | 3422036890 | 18,69 | BA.5.1.1  | 0,2 | Passed | Omicron5 |
| June | 3422036812 | 18,56 | BA.2.10   | 0,4 | Passed | Omicron2 |
| June | 3422036449 | 18,39 | BA.5.2.1  | 0,4 | Passed | Omicron5 |
| June | 3422036799 | 18,27 | BA.2      | 0,4 | Passed | Omicron2 |
| June | 3422036402 | 18,24 | BA.5.1.2  | 0,2 | Passed | Omicron5 |
| June | 3422037003 | 18,15 | BA.2      | 0,1 | Passed | Omicron2 |
| June | 3422036879 | 18,14 | BA.5.1.2  | 1,3 | Passed | Omicron5 |
| June | 3422036416 | 18,08 | BA.5.1    | 0,2 | Passed | Omicron5 |
| June | 3422036410 | 18,06 | BA.5.1.10 | 0,2 | Passed | Omicron5 |
| June | 3422036796 | 17,93 | BA.2      | 0,2 | Passed | Omicron2 |
| June | 3422037233 | 17,92 | BA.2.71   | 0,2 | Passed | Omicron2 |
| June | 3422036899 | 17,91 | BA.2      | 0,2 | Passed | Omicron2 |
| June | 3422037286 | 17,79 | BA.5.1    | 0,4 | Passed | Omicron5 |
| June | 3422036435 | 17,69 | BA.2.52   | 0,4 | Passed | Omicron2 |
| June | 3422036578 | 17,66 | BA.2      | 2,7 | Passed | Omicron2 |
| June | 3422036404 | 17,59 | BA.5.1.2  | 0,1 | Passed | Omicron5 |
| June | 3422037212 | 17,49 | BA.5.1    | 0,2 | Passed | Omicron5 |
| June | 3422036378 | 17,48 | BA.2.9    | 0,4 | Passed | Omicron2 |
| June | 3422036817 | 17,48 | BA.2      | 0,4 | Passed | Omicron2 |
| June | 3422036865 | 17,48 | BA.2      | 0,1 | Passed | Omicron2 |

|      |            |       |           |     |        |          |
|------|------------|-------|-----------|-----|--------|----------|
| June | 3422036810 | 17,44 | BA.5.1    | 0,2 | Passed | Omicron5 |
| June | 3422036805 | 17,42 | BA.5.1    | 1,2 | Passed | Omicron5 |
| June | 3422036433 | 17,41 | BF.27     | 0,3 | Passed | Omicron5 |
| June | 3422036797 | 17,4  | BA.2      | 0,4 | Passed | Omicron2 |
| June | 3422036436 | 17,32 | BA.2.23   | 0,4 | Passed | Omicron2 |
| June | 3422036561 | 17,3  | BA.4.1    | 1,1 | Passed | Omicron4 |
| June | 3422036889 | 17,16 | BA.5.1    | 0,2 | Passed | Omicron5 |
| June | 3422036374 | 17,13 | BA.2.23   | 0,3 | Passed | Omicron2 |
| June | 3422036381 | 16,97 | BA.5.1    | 0,6 | Passed | Omicron5 |
| June | 3422037287 | 16,92 | BA.5.1    | 0,2 | Passed | Omicron5 |
| June | 3422036907 | 16,89 | BA.4.1    | 0   | Passed | Omicron4 |
| June | 3422036369 | 16,8  | BA.5.1    | 0,2 | Passed | Omicron5 |
| June | 3422036801 | 16,77 | BA.4      | 1,3 | Passed | Omicron4 |
| June | 3422036901 | 16,76 | BA.2      | 0,4 | Passed | Omicron2 |
| June | 3422036393 | 16,7  | BA.5.1    | 0,2 | Passed | Omicron5 |
| June | 3422036875 | 16,66 | BA.5.1    | 0,3 | Passed | Omicron5 |
| June | 3422036400 | 16,61 | BA.2      | 0,4 | Passed | Omicron2 |
| June | 3422036905 | 16,59 | BA.2      | 0,3 | Passed | Omicron2 |
| June | 3422036881 | 16,44 | BA.2.68   | 0,4 | Passed | Omicron2 |
| June | 3422037223 | 16,43 | BA.2      | 0,4 | Passed | Omicron2 |
| June | 3422036793 | 16,39 | BA.2.3.15 | 0,1 | Passed | Omicron2 |
| June | 3422036807 | 16,31 | BA.5.1    | 0,7 | Passed | Omicron5 |
| June | 3422036385 | 16,29 | BA.2      | 0,4 | Passed | Omicron2 |
| June | 3422036415 | 16,08 | BA.5.1    | 0,4 | Passed | Omicron5 |
| June | 3422036786 | 16,05 | BA.2.36   | 0,4 | Passed | Omicron2 |
| June | 3422037206 | 16,04 | BA.2.9    | 0,4 | Passed | Omicron2 |
| June | 3422038518 | 15,95 | BA.5.1    | 0,2 | Passed | Omicron5 |
| June | 3422036891 | 15,82 | BA.5.1.1  | 0,3 | Passed | Omicron5 |
| June | 3422036902 | 15,64 | BA.4.1    | 0,4 | Passed | Omicron4 |
| June | 3422036450 | 15,55 | BA.5.2.1  | 0,3 | Passed | Omicron5 |
| June | 3422036451 | 15,55 | BA.5.1    | 0,4 | Passed | Omicron5 |
| June | 3422036791 | 15,53 | BA.4      | 0,2 | Passed | Omicron4 |
| June | 3422037002 | 15,46 | BA.2      | 0,4 | Passed | Omicron2 |
| June | 3422036447 | 15,28 | BA.5.1    | 0,4 | Passed | Omicron5 |
| June | 3422036409 | 15,26 | BA.2.10   | 0,4 | Passed | Omicron2 |
| June | 3422036795 | 15,24 | BA.5.1    | 0,2 | Passed | Omicron5 |
| June | 3422036870 | 15,23 | BA.5.1    | 0,2 | Passed | Omicron5 |
| June | 3422036868 | 15,2  | BA.5.1    | 0,4 | Passed | Omicron5 |
| June | 3422036808 | 15,08 | BA.5.1.1  | 0,1 | Passed | Omicron5 |
| June | 3422036862 | 14,91 | BA.2      | 0,1 | Passed | Omicron2 |
| June | 3422036873 | 14,88 | BA.5.1    | 0,4 | Passed | Omicron5 |
| June | 3422036437 | 14,55 | BA.2      | 0,2 | Passed | Omicron2 |
| June | 3422036872 | 14,29 | BA.5.1    | 0,3 | Passed | Omicron5 |
| June | 3422038484 | 14,19 | BA.5.1.23 | 0   | Passed | Omicron5 |
| June | 3422036794 | 14,18 | BA.2.3.15 | 0,1 | Passed | Omicron2 |
| June | 3422036373 | 13,98 | BA.2.9    | 0,3 | Passed | Omicron2 |
| June | 3422036391 | 13,95 | BA.2.52   | 0,4 | Passed | Omicron2 |
| June | 3422036863 | 13,83 | BA.4      | 0,2 | Passed | Omicron4 |
| June | 3422036387 | 13,66 | BA.5.1    | 0,2 | Passed | Omicron5 |
| June | 3422036876 | 13,62 | BA.5.1    | 0,2 | Passed | Omicron5 |
| June | 3422036384 | 13,41 | BA.2      | 0,2 | Passed | Omicron2 |
| June | 3422036431 | 13,2  | BA.5.1    | 0,2 | Passed | Omicron5 |
| June | 3422036408 | 13,19 | BA.2      | 0,4 | Passed | Omicron2 |
| June | 3422036371 | 13,15 | BA.5.2    | 0,4 | Passed | Omicron5 |
| June | 3422036885 | 13,11 | BA.2      | 0,2 | Passed | Omicron2 |
| June | 3422036411 | 13,06 | BA.2.3.14 | 2,9 | Passed | Omicron2 |

|      |            |       |           |      |        |          |
|------|------------|-------|-----------|------|--------|----------|
| June | 3422036874 | 12,88 | BA.2.3.15 | 0,4  | Passed | Omicron2 |
| June | 3422036888 | 12,66 | BE.1      | 0,1  | Passed | Omicron5 |
| June | 3422036432 | 12,6  | BA.5.1    | 0,4  | Passed | Omicron5 |
| June | 3422036444 | 12,59 | BA.2.70   | 0,2  | Passed | Omicron2 |
| June | 3422036894 | 12,03 | BA.5.1.1  | 0,2  | Passed | Omicron5 |
| June | 3422036389 | 11,95 | BA.2      | 29,3 | Failed | Omicron2 |
| June | 3422036802 | 11,76 | BA.2      | 0,3  | Passed | Omicron2 |
| June | 3422036392 | 11,64 | BA.2.52   | 0,2  | Passed | Omicron2 |
| June | 3422036581 | 11,38 | BA.5.1    | 0,4  | Passed | Omicron5 |
| June | 3422036376 | 10,84 | BA.2      | 0,2  | Passed | Omicron2 |

Supplementary Table S2

| Month | Sample   | Valore CT | Lineage    | N_consensus   | QC_status | Variante |
|-------|----------|-----------|------------|---------------|-----------|----------|
| July  | 22053762 | 31,58     | BA.2       | 1918 (6.4%)   | Failed    | Omicron2 |
| July  | 22051634 | 30,01     | BA.5       | 7048 (23.9%)  | Failed    | Omicron5 |
| July  | 22051313 | 29,6      | BA.2       | 4055 (13.6%)  | Failed    | Omicron2 |
| July  | 22052871 | 29,42     | Unassigned | 10654 (36.1%) | Failed    | Omicron  |
| July  | 22051309 | 28,36     | BA.5.2.1   | 3398 (11.4%)  | Failed    | Omicron5 |
| July  | 22053625 | 28,19     | BA.2       | 1616 (5.4%)   | Failed    | Omicron2 |
| July  | 22047197 | 28,12     | Unassigned | 9065 (30.7%)  | Failed    | Omicron  |
| July  | 22049749 | 30,75     | BA.5.2     | 118 (0.4%)    | Passed    | Omicron5 |
| July  | 22053386 | 29,9      | BA.2       | 1483 (5.0%)   | Passed    | Omicron2 |
| July  | 22054499 | 29,69     | BA.5.1     | 735 (2.5%)    | Passed    | Omicron5 |
| July  | 22052695 | 28,95     | BA.5.1     | 1457 (4.9%)   | Passed    | Omicron5 |
| July  | 22053622 | 28,26     | BA.5       | 1056 (3.5%)   | Passed    | Omicron5 |
| July  | 22051635 | 27,91     | BA.4       | 5776 (19.4%)  | Failed    | Omicron4 |
| July  | 22046637 | 27,74     | BA.5.2     | 77 (0.3%)     | Passed    | Omicron5 |
| July  | 22050694 | 27,73     | BA.4       | 2945 (9.9%)   | Failed    | Omicron4 |
| July  | 22050682 | 27,59     | BF.4       | 2520 (8.4%)   | Failed    | Omicron5 |
| July  | 22052867 | 26,9      | BA.5.2.1   | 846 (2.8%)    | Passed    | Omicron5 |
| July  | 22052719 | 26,45     | BA.5.2     | 3227 (10.8%)  | Failed    | Omicron5 |
| July  | 22052877 | 26,32     | BA.5       | 714 (2.4%)    | Passed    | Omicron5 |
| July  | 22051306 | 25,56     | BA.5.1.10  | 2402 (8.1%)   | Failed    | Omicron5 |
| July  | 22047897 | 25,51     | BA.5.2.1   | 3024 (10.1%)  | Failed    | Omicron5 |
| July  | 22054287 | 25,38     | BA.5.1     | 1048 (3.5%)   | Passed    | Omicron5 |
| July  | 22052872 | 25,27     | BF.1       | 2777 (9.3%)   | Failed    | Omicron5 |
| July  | 22047899 | 25,11     | BA.5.1     | 2591 (8.8%)   | Failed    | Omicron5 |
| July  | 22053764 | 25,1      | BE.1       | 516 (1.7%)    | Passed    | Omicron5 |
| July  | 22052704 | 25,08     | BA.5.1.24  | 3182 (10.7%)  | Failed    | Omicron5 |
| July  | 22051636 | 24,87     | BA.5.1     | 2073 (7.0%)   | Failed    | Omicron5 |
| July  | 22053294 | 24,77     | BA.5.1     | 481 (1.6%)    | Passed    | Omicron5 |
| July  | 22053380 | 24,55     | BA.5.1     | 344 (1.2%)    | Passed    | Omicron5 |
| July  | 22047385 | 24,41     | BA.5.1     | 3001 (10.0%)  | Failed    | Omicron5 |
| July  | 22052213 | 24,37     | BA.5.1     | 99 (0.3%)     | Passed    | Omicron5 |
| July  | 22053637 | 23,8      | BA.5.1     | 287 (1.0%)    | Passed    | Omicron5 |
| July  | 22053385 | 23,64     | BE.1       | 390 (1.3%)    | Passed    | Omicron5 |
| July  | 22054282 | 23,56     | BA.5.1     | 315 (1.1%)    | Passed    | Omicron5 |
| July  | 22053291 | 23,49     | BA.5.1.23  | 298 (1.0%)    | Passed    | Omicron5 |
| July  | 22050714 | 23,46     | BA.5.1     | 1486 (5.0%)   | Passed    | Omicron5 |
| July  | 22053623 | 23,38     | BA.5.1     | 568 (1.9%)    | Passed    | Omicron5 |
| July  | 22047907 | 23,29     | BA.2.9.3   | 1889 (6.3%)   | Failed    | Omicron2 |
| July  | 22052698 | 23,28     | BA.5.1     | 114 (0.4%)    | Passed    | Omicron5 |
| July  | 22051310 | 22,96     | BA.5.1     | 713 (2.4%)    | Passed    | Omicron5 |
| July  | 22052874 | 22,92     | BA.5.1     | 472 (1.6%)    | Passed    | Omicron5 |
| July  | 22052875 | 22,88     | BA.5.1     | 1651 (5.6%)   | Failed    | Omicron5 |
| July  | 22052216 | 22,73     | BE.1.1     | 877 (2.9%)    | Passed    | Omicron5 |
| July  | 22051642 | 22,72     | BE.1       | 1539 (5.2%)   | Failed    | Omicron5 |
| July  | 22054212 | 22,52     | BE.1       | 243 (0.8%)    | Passed    | Omicron5 |
| July  | 22052697 | 22,48     | BA.5.2     | 1025 (3.4%)   | Passed    | Omicron5 |
| July  | 22052699 | 22,09     | BA.5.1     | 1157 (3.9%)   | Passed    | Omicron5 |
| July  | 22053279 | 21,92     | BA.5.1     | 222 (0.7%)    | Passed    | Omicron5 |
| July  | 22049747 | 21,69     | BA.5.1     | 133 (0.4%)    | Passed    | Omicron5 |
| July  | 22053295 | 21,59     | BA.5.2.1   | 227 (0.8%)    | Passed    | Omicron5 |
| July  | 22046635 | 21,46     | BA.5.1     | 76 (0.3%)     | Passed    | Omicron5 |
| July  | 22049788 | 21,46     | BE.1.1     | 580 (1.9%)    | Passed    | Omicron5 |
| July  | 22053293 | 21,46     | BA.5.1     | 350 (1.2%)    | Passed    | Omicron5 |
| July  | 22053283 | 21,41     | BA.5.1.2   | 450 (1.5%)    | Passed    | Omicron5 |
| July  | 22050715 | 21,28     | BA.5.1     | 181 (0.6%)    | Passed    | Omicron5 |
| July  | 22051312 | 21,24     | BA.5.2     | 1076 (3.6%)   | Passed    | Omicron5 |
| July  | 22051632 | 21,2      | BA.5.2     | 333 (1.1%)    | Passed    | Omicron5 |
| July  | 22047367 | 21,14     | BA.5.1     | 1224 (4.1%)   | Passed    | Omicron5 |
| July  | 22053382 | 21,13     | BA.5.2.1   | 380 (1.3%)    | Passed    | Omicron5 |
| July  | 22054281 | 21,07     | BA.5.1     | 205 (0.7%)    | Passed    | Omicron5 |
| July  | 22047366 | 20,93     | BA.5.1     | 657 (2.2%)    | Passed    | Omicron5 |
| July  | 22053778 | 20,81     | BA.5.1.10  | 744 (2.5%)    | Passed    | Omicron5 |
| July  | 22047375 | 20,8      | BA.2.1     | 887 (3.0%)    | Passed    | Omicron2 |
| July  | 22050697 | 20,79     | BA.5.2     | 107 (0.4%)    | Passed    | Omicron5 |
| July  | 22052706 | 20,65     | BA.5.1.24  | 331 (1.1%)    | Passed    | Omicron5 |
| July  | 22049790 | 20,63     | BA.5.1     | 120 (0.4%)    | Passed    | Omicron5 |
| July  | 22047198 | 20,49     | BA.5.1.10  | 201 (0.7%)    | Passed    | Omicron5 |
| July  | 22052878 | 20,15     | BA.5.1     | 116 (0.4%)    | Passed    | Omicron5 |
| July  | 22053648 | 20,08     | BF.7       | 286 (1.0%)    | Passed    | Omicron5 |
| July  | 22053274 | 19,68     | BA.5.1     | 538 (1.8%)    | Passed    | Omicron5 |
| July  | 22051305 | 19,63     | BA.5.1.10  | 114 (0.4%)    | Passed    | Omicron5 |
| July  | 22053394 | 19,51     | BE.1.3     | 186 (0.6%)    | Passed    | Omicron5 |
| July  | 22053620 | 19,51     | BA.5.1     | 264 (0.9%)    | Passed    | Omicron5 |

|      |          |       |           |              |        |              |
|------|----------|-------|-----------|--------------|--------|--------------|
| July | 22054284 | 19,51 | BA.5.2.59 | 154 (0.5%)   | Passed | Omicron5     |
| July | 22052696 | 19,5  | BA.5.1    | 273 (0.9%)   | Passed | Omicron5     |
| July | 22052870 | 19,41 | BA.5.1    | 460 (1.5%)   | Passed | Omicron5     |
| July | 22053624 | 19,39 | BA.5.1    | 285 (1.0%)   | Passed | Omicron5     |
| July | 22050688 | 19,36 | BA.5.1.30 | 118 (0.4%)   | Passed | Omicron5     |
| July | 22052880 | 19,19 | BA.5.2.1  | 167 (0.6%)   | Passed | Omicron5     |
| July | 22049647 | 19,02 | BA.5.1    | 119 (0.4%)   | Passed | Omicron5     |
| July | 22053785 | 18,91 | BA.5.1.23 | 336 (1.1%)   | Passed | Omicron5     |
| July | 22053392 | 18,85 | BA.5.1.10 | 174 (0.6%)   | Passed | Omicron5     |
| July | 22046891 | 18,79 | BA.4      | 87 (0.3%)    | Passed | Omicron4     |
| July | 22049795 | 18,76 | BA.5.1    | 313 (1.1%)   | Passed | Omicron5     |
| July | 22047193 | 18,69 | BA.5.1.30 | 117 (0.4%)   | Passed | Omicron5     |
| July | 22053631 | 18,65 | BA.5.1    | 193 (0.6%)   | Passed | Omicron5     |
| July | 22047892 | 18,56 | BA.5.1    | 199 (0.7%)   | Passed | Omicron5     |
| July | 22054283 | 18,51 | BA.5.1    | 430 (1.4%)   | Passed | Omicron5     |
| July | 22047895 | 18,5  | BA.5.1    | 11 (0.0%)    | Passed | Omicron5     |
| July | 22046889 | 18,4  | BA.5.2    | 1665 (5.6%)  | Failed | Omicron5     |
| July | 22053388 | 18,32 | BE.1      | 349 (1.2%)   | Passed | Omicron5     |
| July | 22052215 | 18,1  | BA.5.1.10 | 280 (0.9%)   | Passed | Omicron5     |
| July | 22047365 | 18,03 | BA.5.1    | 77 (0.3%)    | Passed | Omicron5     |
| July | 22049793 | 18,02 | BA.5.2.1  | 287 (1.0%)   | Passed | Omicron5     |
| July | 22054286 | 17,83 | BA.5.2    | 117 (0.4%)   | Passed | Omicron5     |
| July | 22051304 | 17,68 | BA.5.1.10 | 62 (0.2%)    | Passed | Omicron5     |
| July | 22053638 | 17,67 | BA.5.1    | 29 (0.1%)    | Passed | Omicron5     |
| July | 22053766 | 17,62 | BA.5.2.9  | 58 (0.2%)    | Passed | Omicron5     |
| July | 22047362 | 17,49 | BA.5.1    | 218 (0.7%)   | Passed | Omicron5     |
| July | 22049746 | 17,47 | BA.4.6    | 95 (0.3%)    | Passed | Omicron4     |
| July | 22054502 | 17,19 | BA.5.1    | 113 (0.4%)   | Passed | Omicron5     |
| July | 22054501 | 17,09 | BA.5.1.3  | 99 (0.3%)    | Passed | Omicron5     |
| July | 22054513 | 17,06 | BA.4.7    | 335 (1.1%)   | Passed | Omicron4     |
| July | 22049659 | 16,83 | BA.5.2.1  | 118 (0.4%)   | Passed | Omicron5     |
| July | 22052881 | 16,82 | BA.5.1    | 120 (0.4%)   | Passed | Omicron5     |
| July | 22053864 | 16,8  | BA.5.2.1  | 116 (0.4%)   | Passed | Omicron5     |
| July | 22054288 | 16,75 | BA.5.1    | 73 (0.2%)    | Passed | Omicron5     |
| July | 22053269 | 16,72 | BA.5.2    | 117 (0.4%)   | Passed | Omicron5     |
| July | 22054500 | 16,71 | BA.5.1.3  | 28 (0.1%)    | Passed | Omicron5     |
| July | 22046634 | 16,51 | BA.5.2.12 | 5907 (19.8%) | Failed | Omicron5     |
| July | 22046886 | 16,49 | BA.5.1.10 | 114 (0.4%)   | Passed | Omicron5     |
| July | 22053769 | 16,47 | BA.5.2    | 74 (0.2%)    | Passed | Omicron5     |
| July | 22046887 | 16,41 | BA.5.1.1  | 78 (0.3%)    | Passed | Omicron5     |
| July | 22047909 | 16,4  | BA.5.1    | 65 (0.2%)    | Passed | Omicron5     |
| July | 22052707 | 16,4  | BA.5.1    | 82 (0.3%)    | Passed | Omicron5     |
| July | 22050685 | 16,32 | BA.5.1    | 11 (0.0%)    | Passed | Omicron5     |
| July | 22049750 | 16,25 | BA.5.1    | 921 (3.1%)   | Passed | Omicron5     |
| July | 22054498 | 16,25 | XAZ       | 68 (0.2%)    | Passed | Ricombinante |
| July | 22050683 | 16,2  | BA.5.1    | 99 (0.3%)    | Passed | Omicron5     |
| July | 22051311 | 16,19 | BA.5.1    | 63 (0.2%)    | Passed | Omicron5     |
| July | 22047360 | 15,82 | BA.5.1    | 69 (0.2%)    | Passed | Omicron5     |
| July | 22049748 | 15,77 | BA.5.1    | 6507 (21.8%) | Failed | Omicron5     |
| July | 22053640 | 15,72 | BA.5.1    | 116 (0.4%)   | Passed | Omicron5     |
| July | 22047361 | 15,47 | BA.5.1    | 67 (0.2%)    | Passed | Omicron5     |
| July | 22053278 | 15,47 | BF.2      | 69 (0.2%)    | Passed | Omicron5     |
| July | 22054511 | 15,38 | BA.4      | 69 (0.2%)    | Passed | Omicron4     |
| July | 22052700 | 15,37 | BA.5.1    | 77 (0.3%)    | Passed | Omicron5     |
| July | 22047371 | 15,19 | BA.5.1    | 114 (0.4%)   | Passed | Omicron5     |
| July | 22046877 | 15,06 | BA.5.2    | 81 (0.3%)    | Passed | Omicron5     |
| July | 22051648 | 15,06 | BE.1      | 73 (0.2%)    | Passed | Omicron5     |
| July | 22049791 | 15,01 | BA.5.1.10 | 889 (3.0%)   | Passed | Omicron5     |
| July | 22053387 | 14,96 | BA.5.2.1  | 68 (0.2%)    | Passed | Omicron5     |
| July | 22047201 | 14,87 | BA.5.1    | 88 (0.3%)    | Passed | Omicron5     |
| July | 22054503 | 14,81 | BA.5.1    | 73 (0.2%)    | Passed | Omicron5     |
| July | 22047199 | 14,71 | BA.5.2    | 118 (0.4%)   | Passed | Omicron5     |
| July | 22054289 | 14,68 | BA.5.2.44 | 16 (0.1%)    | Passed | Omicron5     |
| July | 22051307 | 14,49 | BA.5.1    | 67 (0.2%)    | Passed | Omicron5     |
| July | 22047363 | 14,48 | BA.5.1    | 117 (0.4%)   | Passed | Omicron5     |
| July | 22051640 | 14,42 | BA.5.1    | 862 (2.9%)   | Passed | Omicron5     |
| July | 22052218 | 14,34 | BA.5.1    | 69 (0.2%)    | Passed | Omicron5     |
| July | 22054510 | 14,18 | BA.4      | 118 (0.4%)   | Passed | Omicron4     |
| July | 22053381 | 14,16 | BA.5.1.30 | 116 (0.4%)   | Passed | Omicron5     |
| July | 22053384 | 14,01 | BA.2.52   | 74 (0.2%)    | Passed | Omicron2     |
| July | 22047917 | 13,75 | BA.5.1    | 491 (1.6%)   | Passed | Omicron5     |
| July | 22052221 | 13,57 | BA.5.2    | 98 (0.3%)    | Passed | Omicron5     |
| July | 22052217 | 13,52 | BA.5.2    | 114 (0.4%)   | Passed | Omicron5     |
| July | 22052214 | 13,37 | BA.5.1.15 | 3807 (12.8%) | Failed | Omicron5     |
| July | 22052219 | 13,1  | BA.5.1    | 76 (0.3%)    | Passed | Omicron5     |

|      |          |       |           |            |        |          |
|------|----------|-------|-----------|------------|--------|----------|
| July | 22051308 | 13,05 | BA.5.1.30 | 118 (0.4%) | Passed | Omicron5 |
| July | 22051630 | 12,93 | BA.5.2    | 71 (0.2%)  | Passed | Omicron5 |
| July | 22051629 | 12,89 | BE.1      | 778 (2.6%) | Passed | Omicron5 |
| July | 22046890 | 12,74 | BE.1      | 81 (0.3%)  | Passed | Omicron5 |
| July | 22047195 | 12,49 | BA.5.1    | 70 (0.2%)  | Passed | Omicron5 |
| July | 22049654 | 12,32 | BE.1      | 76 (0.3%)  | Passed | Omicron5 |
| July | 22052220 | 11,97 | BA.5.1.10 | 69 (0.2%)  | Passed | Omicron5 |
| July | 22052212 | 11,9  | BE.2      | 87 (0.3%)  | Passed | Omicron5 |
| July | 22053765 | 11,9  | BA.5.1    | 458 (1.5%) | Passed | Omicron5 |
| July | 22050716 | 11,67 | BA.5.1    | 42 (0.1%)  | Passed | Omicron5 |
| July | 22054211 | 11,49 | BE.3      | 15 (0.1%)  | Passed | Omicron5 |



Supplementary Table S3

| Month  | Sample   | Valore CT | Lineage    | N_consensus   | QC_status | Variante |
|--------|----------|-----------|------------|---------------|-----------|----------|
| August | 22055422 | 35,95     | BA.5.1     | 293 (1.0%)    | Passed    | Omicron5 |
| August | 22055399 | 30,61     | BA.5.1     | 1095 (3.7%)   | Passed    | Omicron5 |
| August | 22055379 | 30,55     | BA.5.1     | 362 (1.2%)    | Passed    | Omicron5 |
| August | 22055406 | 30,53     | BA.5.1     | 1081 (3.6%)   | Passed    | Omicron5 |
| August | 22055410 | 30,5      | BA.5.1     | 222 (0.7%)    | Passed    | Omicron5 |
| August | 22057641 | 30,49     | BA.5.1     | 2928 (9.8%)   | Failed    | Omicron5 |
| August | 22055397 | 29,99     | BA.5.1.3   | 1020 (3.4%)   | Passed    | Omicron5 |
| August | 22055852 | 29,59     | BA.4.1     | 2116 (7.1%)   | Failed    | Omicron4 |
| August | 22055371 | 29,27     | BA.5.2.1   | 883 (3.0%)    | Passed    | Omicron5 |
| August | 22055363 | 29,23     | BA.5.1     | 241 (0.8%)    | Passed    | Omicron5 |
| August | 22055861 | 28,94     | BA.5.1     | 2366 (7.9%)   | Failed    | Omicron5 |
| August | 22057978 | 28,83     | BA.5.2     | 998 (3.4%)    | Passed    | Omicron5 |
| August | 22057043 | 28,56     | BA.5.2     | 341 (1.1%)    | Passed    | Omicron5 |
| August | 22057122 | 28,04     | BA.5.1.10  | 1659 (5.6%)   | Failed    | Omicron5 |
| August | 22055409 | 27,94     | BA.5.1     | 24 (0.1%)     | Passed    | Omicron5 |
| August | 22055854 | 27,56     | Unassigned | 13261 (44.5%) | Failed    | Omicron  |
| August | 22055362 | 27,54     | BA.5.1     | 408 (1.4%)    | Passed    | Omicron5 |
| August | 22058426 | 27,54     | BA.5.2     | 2121 (7.1%)   | Failed    | Omicron5 |
| August | 22056498 | 27,32     | BA.5.1.22  | 1170 (3.9%)   | Passed    | Omicron5 |
| August | 22056491 | 27,3      | BA.5.2     | 1261 (4.2%)   | Passed    | Omicron5 |
| August | 22055417 | 27,28     | BA.5.1     | 731 (2.5%)    | Passed    | Omicron5 |
| August | 22058324 | 27,24     | BA.5.1     | 277 (0.9%)    | Passed    | Omicron5 |
| August | 22057113 | 27,17     | BA.5.1     | 1690 (5.7%)   | Failed    | Omicron5 |
| August | 22055420 | 27,07     | BA.5.1     | 1012 (3.4%)   | Passed    | Omicron5 |
| August | 22056222 | 27,04     | BA.5.2     | 672 (2.3%)    | Passed    | Omicron5 |
| August | 22056494 | 27,01     | BA.5.2.22  | 1148 (3.9%)   | Passed    | Omicron5 |
| August | 22055337 | 26,99     | BA.5.1     | 1018 (3.4%)   | Passed    | Omicron5 |
| August | 22055859 | 26,85     | BA.5.2     | 1403 (4.7%)   | Passed    | Omicron5 |
| August | 22055407 | 26,8      | BA.5.1     | 552 (1.9%)    | Passed    | Omicron5 |
| August | 22055390 | 26,69     | BA.5.1     | 833 (2.8%)    | Passed    | Omicron5 |
| August | 22055941 | 26,69     | BA.5.1     | 618 (2.1%)    | Passed    | Omicron5 |
| August | 22055389 | 26,46     | BA.5.1     | 893 (3.0%)    | Passed    | Omicron5 |
| August | 22055663 | 26,38     | BE.1.1     | 531 (1.8%)    | Passed    | Omicron5 |
| August | 22056493 | 26,1      | BE.1       | 971 (3.3%)    | Passed    | Omicron5 |
| August | 22056813 | 26,07     | BA.5.1.2   | 1071 (3.6%)   | Passed    | Omicron5 |
| August | 22055360 | 26,06     | BA.5.1     | 813 (2.7%)    | Passed    | Omicron5 |
| August | 22057288 | 26        | BA.5.1.5   | 604 (2.0%)    | Passed    | Omicron5 |
| August | 22057890 | 25,93     | BA.5.2     | 641 (2.1%)    | Passed    | Omicron5 |
| August | 22055335 | 25,85     | BA.5.1     | 21 (0.1%)     | Passed    | Omicron5 |
| August | 22055376 | 25,62     | BA.5.1     | 884 (3.0%)    | Passed    | Omicron5 |
| August | 22057660 | 25,62     | BA.5.1.30  | 888 (3.0%)    | Passed    | Omicron5 |
| August | 22055357 | 25,55     | BA.5.1     | 116 (0.4%)    | Passed    | Omicron5 |
| August | 22055669 | 25,23     | BA.4       | 535 (1.8%)    | Passed    | Omicron4 |
| August | 22055339 | 25,18     | BA.5.1.30  | 459 (1.5%)    | Passed    | Omicron5 |
| August | 22057135 | 25,16     | BA.5.1     | 487 (1.6%)    | Passed    | Omicron5 |
| August | 22057991 | 24,86     | BF.5       | 888 (3.0%)    | Passed    | Omicron5 |
| August | 22055331 | 24,75     | BA.5.1     | 217 (0.7%)    | Passed    | Omicron5 |
| August | 22056706 | 24,51     | BA.5.2.2   | 424 (1.4%)    | Passed    | Omicron5 |
| August | 22056213 | 24,49     | BA.5.2     | 116 (0.4%)    | Passed    | Omicron5 |
| August | 22058130 | 24,48     | BA.5.1     | 1212 (4.1%)   | Passed    | Omicron5 |
| August | 22057378 | 24,43     | BA.5.2.1   | 563 (1.9%)    | Passed    | Omicron5 |
| August | 22055338 | 24,26     | BA.5.1     | 574 (1.9%)    | Passed    | Omicron5 |
| August | 22055361 | 24,23     | BA.5.1.35  | 562 (1.9%)    | Passed    | Omicron5 |
| August | 22056704 | 24,2      | BA.5.1.35  | 828 (2.8%)    | Passed    | Omicron5 |
| August | 22057983 | 24        | BA.5.9     | 232 (0.8%)    | Passed    | Omicron5 |
| August | 22055355 | 23,97     | BA.5.1     | 552 (1.9%)    | Passed    | Omicron5 |
| August | 22058125 | 23,74     | BA.5.1     | 1298 (4.4%)   | Passed    | Omicron5 |
| August | 22057650 | 23,59     | BA.5.2.21  | 866 (2.9%)    | Passed    | Omicron5 |
| August | 22057025 | 23,57     | BA.5.2.1   | 241 (0.8%)    | Passed    | Omicron5 |
| August | 22056337 | 23,51     | BA.5.1     | 619 (2.1%)    | Passed    | Omicron5 |
| August | 22055940 | 23,26     | BA.5       | 180 (0.6%)    | Passed    | Omicron5 |
| August | 22055381 | 23,23     | BA.2.18    | 535 (1.8%)    | Passed    | Omicron2 |
| August | 22055408 | 23,18     | BA.5.2.1   | 345 (1.2%)    | Passed    | Omicron5 |
| August | 22055343 | 23,01     | BA.5.1.30  | 722 (2.4%)    | Passed    | Omicron5 |
| August | 22057385 | 23,01     | BA.5.1     | 546 (1.8%)    | Passed    | Omicron5 |
| August | 22058432 | 22,87     | BA.5.2.1   | 755 (2.5%)    | Passed    | Omicron5 |
| August | 22055365 | 22,76     | BA.5.1.9   | 340 (1.1%)    | Passed    | Omicron5 |
| August | 22056354 | 22,67     | BA.4.6     | 561 (1.9%)    | Passed    | Omicron4 |

|        |          |       |           |             |        |          |
|--------|----------|-------|-----------|-------------|--------|----------|
| August | 22056499 | 22,66 | BA.5.1.22 | 228 (0.8%)  | Passed | Omicron5 |
| August | 22058325 | 22,61 | BA.5.2    | 492 (1.7%)  | Passed | Omicron5 |
| August | 22055334 | 22,54 | BA.5      | 118 (0.4%)  | Passed | Omicron5 |
| August | 22056339 | 22,5  | BA.5.2    | 280 (0.9%)  | Passed | Omicron5 |
| August | 22055347 | 22,49 | BA.5.1    | 34 (0.1%)   | Passed | Omicron5 |
| August | 22056220 | 22,48 | BA.2.12.1 | 353 (1.2%)  | Passed | Omicron2 |
| August | 22057388 | 22,47 | BE.1.1    | 281 (0.9%)  | Passed | Omicron5 |
| August | 22055659 | 22,46 | BE.1.1    | 156 (0.5%)  | Passed | Omicron5 |
| August | 22055415 | 22,39 | BA.5.1    | 118 (0.4%)  | Passed | Omicron5 |
| August | 22058329 | 22,39 | BA.5.3    | 118 (0.4%)  | Passed | Omicron5 |
| August | 22055939 | 22,38 | BA.5.2.1  | 360 (1.2%)  | Passed | Omicron5 |
| August | 22056218 | 22,2  | BA.5.2.28 | 303 (1.0%)  | Passed | Omicron5 |
| August | 22057044 | 22,19 | BA.5.2.1  | 208 (0.7%)  | Passed | Omicron5 |
| August | 22056808 | 22,18 | BA.5.2.1  | 728 (2.4%)  | Passed | Omicron5 |
| August | 22055662 | 21,94 | BE.1.1    | 255 (0.9%)  | Passed | Omicron5 |
| August | 22055364 | 21,91 | BA.4      | 65 (0.2%)   | Passed | Omicron4 |
| August | 22056815 | 21,86 | BA.5.1.2  | 482 (1.6%)  | Passed | Omicron5 |
| August | 22055327 | 21,79 | BA.5.1.21 | 586 (2.0%)  | Passed | Omicron5 |
| August | 22057019 | 21,72 | BA.5.2.21 | 218 (0.7%)  | Passed | Omicron5 |
| August | 22057268 | 21,69 | BF.28     | 170 (0.6%)  | Passed | Omicron5 |
| August | 22055667 | 21,68 | BA.4.6    | 63 (0.2%)   | Passed | Omicron4 |
| August | 22057850 | 21,64 | BA.5.1.1  | 234 (0.8%)  | Passed | Omicron5 |
| August | 22057853 | 21,59 | BA.5.2    | 313 (1.0%)  | Passed | Omicron5 |
| August | 22058322 | 21,49 | BA.5.1    | 316 (1.1%)  | Passed | Omicron5 |
| August | 22055668 | 21,35 | BA.5.2.1  | 194 (0.7%)  | Passed | Omicron5 |
| August | 22055395 | 21,33 | BA.5.2.1  | 325 (1.1%)  | Passed | Omicron5 |
| August | 22055938 | 21,18 | BA.5.2    | 348 (1.2%)  | Passed | Omicron5 |
| August | 22055375 | 20,89 | BA.4      | 186 (0.6%)  | Passed | Omicron4 |
| August | 22056916 | 20,85 | BA.5.1.8  | 313 (1.0%)  | Passed | Omicron5 |
| August | 22055350 | 20,75 | BA.5.1    | 243 (0.8%)  | Passed | Omicron5 |
| August | 22055855 | 20,75 | BF.5      | 64 (0.2%)   | Passed | Omicron5 |
| August | 22055419 | 20,71 | BA.5.1.10 | 293 (1.0%)  | Passed | Omicron5 |
| August | 22057129 | 20,69 | BA.5.1    | 239 (0.8%)  | Passed | Omicron5 |
| August | 22058430 | 20,68 | BA.5.1.24 | 294 (1.0%)  | Passed | Omicron5 |
| August | 22055660 | 20,57 | BA.5.1    | 39 (0.1%)   | Passed | Omicron5 |
| August | 22057888 | 20,52 | BA.5.1.30 | 183 (0.6%)  | Passed | Omicron5 |
| August | 22056492 | 20,44 | BA.5.1    | 201 (0.7%)  | Passed | Omicron5 |
| August | 22056335 | 20,41 | BA.5.1    | 264 (0.9%)  | Passed | Omicron5 |
| August | 22057396 | 20,4  | BA.5.1    | 80 (0.3%)   | Passed | Omicron5 |
| August | 22058438 | 20,37 | BA.5.2.1  | 295 (1.0%)  | Passed | Omicron5 |
| August | 22055384 | 20,35 | BA.5.1    | 210 (0.7%)  | Passed | Omicron5 |
| August | 22056624 | 20,3  | BA.5.2.1  | 87 (0.3%)   | Passed | Omicron5 |
| August | 22057265 | 20,26 | BA.5.1    | 343 (1.1%)  | Passed | Omicron5 |
| August | 22055411 | 20,16 | BA.4.1.1  | 299 (1.0%)  | Passed | Omicron4 |
| August | 22056908 | 20,12 | BA.5.1    | 244 (0.8%)  | Passed | Omicron5 |
| August | 22055860 | 20,09 | BA.5.2    | 118 (0.4%)  | Passed | Omicron5 |
| August | 22055933 | 20,08 | BA.5      | 2283 (7.7%) | Failed | Omicron5 |
| August | 22055346 | 20,06 | BA.5.2.1  | 142 (0.5%)  | Passed | Omicron5 |
| August | 22056707 | 20,05 | BA.5.2    | 254 (0.9%)  | Passed | Omicron5 |
| August | 22055856 | 20,02 | BA.5.1    | 130 (0.4%)  | Passed | Omicron5 |
| August | 22055393 | 19,98 | BA.5.1    | 569 (1.9%)  | Passed | Omicron5 |
| August | 22056548 | 19,92 | BA.5.2.1  | 118 (0.4%)  | Passed | Omicron5 |
| August | 22055670 | 19,9  | BA.4      | 71 (0.2%)   | Passed | Omicron4 |
| August | 22056334 | 19,89 | BA.5.2.1  | 278 (0.9%)  | Passed | Omicron5 |
| August | 22057981 | 19,85 | BE.1.1    | 110 (0.4%)  | Passed | Omicron5 |
| August | 22057849 | 19,82 | BE.1      | 18 (0.1%)   | Passed | Omicron5 |
| August | 22057015 | 19,66 | BA.4      | 136 (0.5%)  | Passed | Omicron4 |
| August | 22056636 | 19,63 | BF.7      | 118 (0.4%)  | Passed | Omicron5 |
| August | 22056819 | 19,51 | BA.5.1    | 412 (1.4%)  | Passed | Omicron5 |
| August | 22058131 | 19,32 | BA.5.1    | 1631 (5.5%) | Failed | Omicron5 |
| August | 22057380 | 19,29 | BA.5.2.1  | 60 (0.2%)   | Passed | Omicron5 |
| August | 22057124 | 19,27 | BA.5.1.10 | 297 (1.0%)  | Passed | Omicron5 |
| August | 22058330 | 19,17 | BA.5.2.21 | 301 (1.0%)  | Passed | Omicron5 |
| August | 22057375 | 19,11 | BA.5.2.20 | 118 (0.4%)  | Passed | Omicron5 |
| August | 22057022 | 19,07 | BE.1.1    | 166 (0.6%)  | Passed | Omicron5 |
| August | 22055359 | 19,02 | BA.5.1    | 69 (0.2%)   | Passed | Omicron5 |
| August | 22056620 | 18,99 | BE.1.1.2  | 42 (0.1%)   | Passed | Omicron5 |
| August | 22055344 | 18,98 | BA.5.1    | 83 (0.3%)   | Passed | Omicron5 |
| August | 22055946 | 18,97 | BF.11.1   | 110 (0.4%)  | Passed | Omicron5 |
| August | 22056705 | 18,89 | BA.4.6    | 162 (0.5%)  | Passed | Omicron4 |
| August | 22056214 | 18,88 | BA.4      | 287 (1.0%)  | Passed | Omicron4 |

|        |          |       |           |            |        |              |
|--------|----------|-------|-----------|------------|--------|--------------|
| August | 22055326 | 18,84 | BA.5.1    | 289 (1.0%) | Passed | Omicron5     |
| August | 22055370 | 18,75 | BF.27     | 295 (1.0%) | Passed | Omicron5     |
| August | 22055373 | 18,71 | BA.5.1    | 179 (0.6%) | Passed | Omicron5     |
| August | 22056628 | 18,7  | BA.5.2.1  | 109 (0.4%) | Passed | Omicron5     |
| August | 22056330 | 18,64 | BA.5.5    | 336 (1.1%) | Passed | Omicron5     |
| August | 22055853 | 18,59 | BA.5.1    | 192 (0.6%) | Passed | Omicron5     |
| August | 22058427 | 18,55 | BA.5.2.1  | 298 (1.0%) | Passed | Omicron5     |
| August | 22057036 | 18,51 | BE.1.1    | 184 (0.6%) | Passed | Omicron5     |
| August | 22055358 | 18,49 | BA.5.2.1  | 271 (0.9%) | Passed | Omicron5     |
| August | 22056708 | 18,49 | BA.5.1    | 321 (1.1%) | Passed | Omicron5     |
| August | 22058128 | 18,42 | BA.5.1.21 | 292 (1.0%) | Passed | Omicron5     |
| August | 22058132 | 18,32 | BA.5.1    | 619 (2.1%) | Passed | Omicron5     |
| August | 22057014 | 18,3  | BA.5.2    | 50 (0.2%)  | Passed | Omicron5     |
| August | 22058429 | 18,27 | BA.5.2    | 244 (0.8%) | Passed | Omicron5     |
| August | 22057371 | 18,24 | BA.5.2.3  | 71 (0.2%)  | Passed | Omicron5     |
| August | 22058134 | 18,23 | BA.5.1.30 | 537 (1.8%) | Passed | Omicron5     |
| August | 22056621 | 17,73 | BA.5.2    | 116 (0.4%) | Passed | Omicron5     |
| August | 22056623 | 17,73 | BA.5.2.1  | 82 (0.3%)  | Passed | Omicron5     |
| August | 22056907 | 17,55 | BA.5.2.1  | 110 (0.4%) | Passed | Omicron5     |
| August | 22055329 | 17,54 | BA.5.1.22 | 248 (0.8%) | Passed | Omicron5     |
| August | 22055657 | 17,53 | BA.5.1    | 374 (1.3%) | Passed | Omicron5     |
| August | 22057274 | 17,52 | BF.5      | 396 (1.3%) | Passed | Omicron5     |
| August | 22056703 | 17,42 | BF.1      | 72 (0.2%)  | Passed | Omicron5     |
| August | 22058328 | 17,34 | BA.5.3    | 64 (0.2%)  | Passed | Omicron5     |
| August | 22058133 | 17,31 | BA.5.1    | 513 (1.7%) | Passed | Omicron5     |
| August | 22058323 | 17,25 | BA.5.1    | 294 (1.0%) | Passed | Omicron5     |
| August | 22057123 | 17,21 | BA.5.1.10 | 197 (0.7%) | Passed | Omicron5     |
| August | 22057275 | 17,21 | BA.5.2.1  | 223 (0.7%) | Passed | Omicron5     |
| August | 22055858 | 17,15 | BA.5.1.3  | 862 (2.9%) | Passed | Omicron5     |
| August | 22057279 | 17,14 | BA.5.2    | 97 (0.3%)  | Passed | Omicron5     |
| August | 22057989 | 17,14 | BA.5.2.21 | 115 (0.4%) | Passed | Omicron5     |
| August | 22055382 | 17,08 | BA.5.1    | 91 (0.3%)  | Passed | Omicron5     |
| August | 22056340 | 17,08 | BA.5.2.1  | 116 (0.4%) | Passed | Omicron5     |
| August | 22056215 | 17,05 | BA.5.1    | 116 (0.4%) | Passed | Omicron5     |
| August | 22056702 | 17,03 | BA.5.2.1  | 23 (0.1%)  | Passed | Omicron5     |
| August | 22057980 | 17,02 | BF.7      | 91 (0.3%)  | Passed | Omicron5     |
| August | 22058327 | 16,98 | BA.5.2.1  | 352 (1.2%) | Passed | Omicron5     |
| August | 22057894 | 16,9  | BA.5.1    | 326 (1.1%) | Passed | Omicron5     |
| August | 22057112 | 16,73 | BA.5.1    | 118 (0.4%) | Passed | Omicron5     |
| August | 22056331 | 16,59 | BF.1      | 26 (0.1%)  | Passed | Omicron5     |
| August | 22057847 | 16,58 | BA.5.2    | 152 (0.5%) | Passed | Omicron5     |
| August | 22056629 | 16,42 | BA.5.1    | 117 (0.4%) | Passed | Omicron5     |
| August | 22055418 | 16,41 | BA.5.1    | 150 (0.5%) | Passed | Omicron5     |
| August | 22056516 | 16,41 | BA.5.2.1  | 135 (0.5%) | Passed | Omicron5     |
| August | 22055345 | 16,4  | BA.5.2.21 | 90 (0.3%)  | Passed | Omicron5     |
| August | 22057291 | 16,3  | BA.5.1.23 | 14 (0.0%)  | Passed | Omicron5     |
| August | 22058129 | 16,19 | XAZ       | 15 (0.1%)  | Passed | Ricombinante |
| August | 22055366 | 16,08 | BA.5.1.9  | 80 (0.3%)  | Passed | Omicron5     |
| August | 22057017 | 16,06 | BA.5.1.30 | 68 (0.2%)  | Passed | Omicron5     |
| August | 22058321 | 16,01 | BA.2      | 310 (1.0%) | Passed | Omicron5     |
| August | 22056919 | 15,92 | BA.5.1.30 | 42 (0.1%)  | Passed | Omicron5     |
| August | 22058326 | 15,9  | BA.5.2    | 219 (0.7%) | Passed | Omicron5     |
| August | 22055330 | 15,85 | BA.5.1    | 73 (0.2%)  | Passed | Omicron5     |
| August | 22057647 | 15,85 | BA.5.1    | 23 (0.1%)  | Passed | Omicron5     |
| August | 22055351 | 15,76 | BA.5.1    | 101 (0.3%) | Passed | Omicron5     |
| August | 22058127 | 15,75 | BA.5.1.30 | 221 (0.7%) | Passed | Omicron5     |
| August | 22057640 | 15,69 | BE.1.1    | 86 (0.3%)  | Passed | Omicron5     |
| August | 22056710 | 15,63 | BA.5.2.1  | 74 (0.2%)  | Passed | Omicron5     |
| August | 22057884 | 15,6  | BA.5.2.1  | 69 (0.2%)  | Passed | Omicron5     |
| August | 22057372 | 15,57 | BA.5.1.23 | 65 (0.2%)  | Passed | Omicron5     |
| August | 22057639 | 15,54 | BA.5.1    | 181 (0.6%) | Passed | Omicron5     |
| August | 22056343 | 15,51 | BA.5.1    | 70 (0.2%)  | Passed | Omicron5     |
| August | 22055369 | 15,43 | BA.4      | 66 (0.2%)  | Passed | Omicron4     |
| August | 22057648 | 15,4  | BA.5.3.2  | 22 (0.1%)  | Passed | Omicron5     |
| August | 22056630 | 15,35 | BA.5.2.1  | 76 (0.3%)  | Passed | Omicron5     |
| August | 22056711 | 15,33 | BA.5.2.1  | 15 (0.1%)  | Passed | Omicron5     |
| August | 22055372 | 15,32 | BA.5.1    | 118 (0.4%) | Passed | Omicron5     |
| August | 22056217 | 15,27 | BA.5.2    | 118 (0.4%) | Passed | Omicron5     |
| August | 22057642 | 15,24 | BF.5      | 61 (0.2%)  | Passed | Omicron5     |
| August | 22057115 | 15,21 | BA.5.2.9  | 69 (0.2%)  | Passed | Omicron5     |
| August | 22058433 | 15,19 | BA.5.1.5  | 116 (0.4%) | Passed | Omicron5     |

|        |          |       |           |            |        |              |
|--------|----------|-------|-----------|------------|--------|--------------|
| August | 22056906 | 15,04 | BA.5.2.1  | 68 (0.2%)  | Passed | Omicron5     |
| August | 22057285 | 15,03 | BF.7      | 75 (0.3%)  | Passed | Omicron5     |
| August | 22057114 | 15,02 | BA.5.2    | 65 (0.2%)  | Passed | Omicron5     |
| August | 22056632 | 14,9  | BE.1.1    | 73 (0.2%)  | Passed | Omicron5     |
| August | 22057656 | 14,85 | BA.5.2.1  | 26 (0.1%)  | Passed | Omicron5     |
| August | 22058431 | 14,76 | BE.1.1    | 114 (0.4%) | Passed | Omicron5     |
| August | 22056338 | 14,75 | BA.5.2    | 35 (0.1%)  | Passed | Omicron5     |
| August | 22056219 | 14,73 | BA.5.2.1  | 115 (0.4%) | Passed | Omicron5     |
| August | 22055340 | 14,72 | BA.5.2.1  | 334 (1.1%) | Passed | Omicron5     |
| August | 22056915 | 14,71 | BA.5.10   | 19 (0.1%)  | Passed | Omicron5     |
| August | 22056904 | 14,49 | BE.4      | 76 (0.3%)  | Passed | Omicron5     |
| August | 22056709 | 14,35 | BA.5.2    | 108 (0.4%) | Passed | Omicron5     |
| August | 22057374 | 14,29 | BA.5.1.23 | 46 (0.2%)  | Passed | Omicron5     |
| August | 22055328 | 14,1  | BA.5.1.22 | 68 (0.2%)  | Passed | Omicron5     |
| August | 22056911 | 14,05 | BA.4      | 118 (0.4%) | Passed | Omicron4     |
| August | 22056495 | 14,03 | BE.4      | 33 (0.1%)  | Passed | Omicron5     |
| August | 22057979 | 13,99 | BA.5.2    | 38 (0.1%)  | Passed | Omicron5     |
| August | 22055380 | 13,88 | BA.5.1    | 68 (0.2%)  | Passed | Omicron5     |
| August | 22056622 | 13,65 | BE.1      | 51 (0.2%)  | Passed | Omicron5     |
| August | 22056216 | 13,62 | BA.5.1.23 | 82 (0.3%)  | Passed | Omicron5     |
| August | 22055388 | 13,6  | BA.5.1.30 | 30 (0.1%)  | Passed | Omicron5     |
| August | 22055383 | 13,57 | BA.5.1    | 78 (0.3%)  | Passed | Omicron5     |
| August | 22058126 | 13,54 | BA.5.2.9  | 120 (0.4%) | Passed | Omicron5     |
| August | 22055396 | 13,5  | BA.5.2.1  | 68 (0.2%)  | Passed | Omicron5     |
| August | 22057264 | 13,28 | BA.5.1    | 46 (0.2%)  | Passed | Omicron5     |
| August | 22057016 | 13,24 | BA.4      | 68 (0.2%)  | Passed | Omicron4     |
| August | 22055394 | 13,19 | BA.5.1    | 293 (1.0%) | Passed | Omicron5     |
| August | 22055349 | 13,02 | BA.5.1    | 68 (0.2%)  | Passed | Omicron5     |
| August | 22055404 | 13,02 | BA.5.1    | 20 (0.1%)  | Passed | Omicron5     |
| August | 22057985 | 12,91 | BA.5.2    | 28 (0.1%)  | Passed | Omicron5     |
| August | 22056547 | 12,78 | BA.5.2.1  | 118 (0.4%) | Passed | Omicron5     |
| August | 22057644 | 12,71 | BA.5.2    | 118 (0.4%) | Passed | Omicron5     |
| August | 22056810 | 12,41 | BA.5.2.1  | 69 (0.2%)  | Passed | Omicron5     |
| August | 22056924 | 12,41 | BA.5.1    | 70 (0.2%)  | Passed | Omicron5     |
| August | 22055342 | 12,34 | BA.5.1    | 70 (0.2%)  | Passed | Omicron5     |
| August | 22055336 | 12,12 | BA.5.1    | 62 (0.2%)  | Passed | Omicron5     |
| August | 22055368 | 12,11 | BA.5.1.1  | 68 (0.2%)  | Passed | Omicron5     |
| August | 22057892 | 11,87 | XAZ       | 70 (0.2%)  | Passed | Ricombinante |

Supplementary Table S4

| Month     | Sample   | Valore CT | Lineage   | N_consensus  | QC_status | Variante |
|-----------|----------|-----------|-----------|--------------|-----------|----------|
| September | 22059664 | 29,99     | BA.5.1    | 1470 (4.9%)  | Passed    | Omicron5 |
| September | 22059546 | 29,56     | BA.5.1    | 1595 (5.4%)  | Failed    | Omicron5 |
| September | 22058990 | 29,32     | BA.5.2    | 2236 (7.5%)  | Failed    | Omicron5 |
| September | 22058918 | 29,3      | BA.5.1    | 2152 (7.2%)  | Failed    | Omicron5 |
| September | 22059085 | 28,77     | BA.5      | 2137 (7.3%)  | Failed    | Omicron5 |
| September | 22058987 | 28,59     | BA.5.2.21 | 1737 (5.8%)  | Failed    | Omicron5 |
| September | 22058824 | 28,47     | BA.5.2    | 2663 (9.0%)  | Failed    | Omicron5 |
| September | 22058923 | 28,39     | BA.5.1    | 1455 (4.9%)  | Passed    | Omicron5 |
| September | 22058929 | 28,38     | BA.5      | 2486 (8.4%)  | Failed    | Omicron5 |
| September | 22058511 | 28,33     | BA.5.1    | 1820 (6.1%)  | Failed    | Omicron5 |
| September | 22059553 | 28,32     | BA.5.1    | 1233 (4.1%)  | Passed    | Omicron5 |
| September | 22059667 | 28,06     | BA.5.2.1  | 1261 (4.2%)  | Passed    | Omicron5 |
| September | 22058859 | 27,96     | BA.5.1    | 2751 (9.2%)  | Failed    | Omicron5 |
| September | 22058989 | 27,96     | BA.5.1    | 4804 (16.1%) | Failed    | Omicron5 |
| September | 22059091 | 27,94     | BA.5.2    | 988 (3.3%)   | Passed    | Omicron5 |
| September | 22060107 | 27,94     | BA.2      | 2433 (8.2%)  | Failed    | Omicron2 |
| September | 22059094 | 27,42     | BA.5.2.33 | 891 (3.0%)   | Passed    | Omicron5 |
| September | 22059333 | 27,41     | BA.5.1.30 | 950 (3.2%)   | Passed    | Omicron5 |
| September | 22060007 | 27,4      | BA.4      | 943 (3.2%)   | Passed    | Omicron4 |
| September | 22058820 | 27,29     | BA.5.1.22 | 1624 (5.4%)  | Failed    | Omicron5 |
| September | 22059339 | 27,21     | BA.5.2    | 849 (2.8%)   | Passed    | Omicron5 |
| September | 22059554 | 27,21     | BA.5.1.24 | 1104 (3.7%)  | Passed    | Omicron5 |
| September | 22059923 | 27,09     | BE.1.1    | 763 (2.6%)   | Passed    | Omicron5 |
| September | 22058832 | 26,94     | BF.28     | 1128 (3.8%)  | Passed    | Omicron5 |
| September | 22060212 | 26,84     | BA.5.2.1  | 312 (1.0%)   | Passed    | Omicron5 |
| September | 22060004 | 26,79     | BA.4      | 1079 (3.6%)  | Passed    | Omicron4 |
| September | 22060016 | 26,74     | BA.5.2.1  | 1297 (4.4%)  | Passed    | Omicron5 |
| September | 22059107 | 26,65     | BA.5.1.30 | 2012 (6.8%)  | Failed    | Omicron5 |
| September | 22059596 | 26,64     | BA.5.1    | 868 (2.9%)   | Passed    | Omicron5 |
| September | 22058837 | 26,46     | BA.5.2.1  | 1417 (4.8%)  | Passed    | Omicron5 |
| September | 22059114 | 26,36     | BA.5.1.30 | 1426 (4.8%)  | Passed    | Omicron5 |
| September | 22058822 | 26,13     | BA.5.1    | 1143 (3.8%)  | Passed    | Omicron5 |
| September | 22059097 | 26,12     | BA.2      | 190 (0.6%)   | Passed    | Omicron2 |
| September | 22058919 | 25,8      | BA.2      | 655 (2.2%)   | Passed    | Omicron2 |
| September | 22058830 | 25,79     | BA.5.2.26 | 1563 (5.2%)  | Failed    | Omicron5 |
| September | 22058571 | 25,71     | BA.5.2.1  | 1377 (4.6%)  | Passed    | Omicron5 |
| September | 22059762 | 25,65     | BA.5.2    | 602 (2.0%)   | Passed    | Omicron5 |
| September | 22059669 | 25,49     | BE.1.1    | 913 (3.1%)   | Passed    | Omicron5 |
| September | 22058860 | 25,26     | BA.5.2.1  | 1629 (5.5%)  | Failed    | Omicron5 |
| September | 22059765 | 25,23     | BA.5.1    | 3070 (10.3%) | Failed    | Omicron5 |
| September | 22058985 | 25,2      | BA.5.1.30 | 575 (1.9%)   | Passed    | Omicron5 |
| September | 22059550 | 25,2      | BA.5      | 2481 (8.3%)  | Failed    | Omicron5 |
| September | 22058833 | 24,92     | BA.4.4    | 1401 (4.7%)  | Passed    | Omicron4 |
| September | 22058590 | 24,76     | BA.5.1    | 927 (3.1%)   | Passed    | Omicron5 |
| September | 22059665 | 24,4      | BA.5.2.1  | 845 (2.8%)   | Passed    | Omicron5 |
| September | 22058836 | 24,37     | BA.5.6    | 961 (3.2%)   | Passed    | Omicron5 |
| September | 22059332 | 24,37     | BA.4.1    | 588 (2.0%)   | Passed    | Omicron4 |
| September | 22058506 | 24,34     | BA.5.2.1  | 802 (2.7%)   | Passed    | Omicron5 |
| September | 22059102 | 24,32     | BA.5.2    | 732 (2.5%)   | Passed    | Omicron5 |
| September | 22059965 | 24,24     | BF.5      | 345 (1.2%)   | Passed    | Omicron5 |
| September | 22059330 | 24,21     | BA.5.1.30 | 647 (2.2%)   | Passed    | Omicron5 |
| September | 22059988 | 24,13     | BF.10     | 259 (0.9%)   | Passed    | Omicron5 |
| September | 22058718 | 24,1      | BA.5.2.1  | 687 (2.3%)   | Passed    | Omicron5 |
| September | 22059924 | 24        | BA.5.2.20 | 317 (1.1%)   | Passed    | Omicron5 |
| September | 22059326 | 23,83     | BA.5.2.1  | 627 (2.1%)   | Passed    | Omicron5 |
| September | 22058862 | 23,5      | BA.5.2.1  | 524 (1.8%)   | Passed    | Omicron5 |
| September | 22058569 | 23,43     | BA.5.1    | 827 (2.8%)   | Passed    | Omicron5 |
| September | 22058717 | 23,26     | BA.5.1.10 | 705 (2.4%)   | Passed    | Omicron5 |
| September | 22059764 | 23,26     | BA.5.1    | 601 (2.0%)   | Passed    | Omicron5 |

|           |          |       |           |             |        |          |
|-----------|----------|-------|-----------|-------------|--------|----------|
| September | 22060219 | 23,23 | BA.5.2    | 413 (1.4%)  | Passed | Omicron5 |
| September | 22058928 | 23,22 | BA.5.6    | 576 (1.9%)  | Passed | Omicron5 |
| September | 22058721 | 23,07 | BA.5.1    | 579 (1.9%)  | Passed | Omicron5 |
| September | 22059670 | 22,99 | BA.5.2.1  | 264 (0.9%)  | Passed | Omicron5 |
| September | 22059852 | 22,94 | BA.5.1    | 345 (1.2%)  | Passed | Omicron5 |
| September | 22059106 | 22,81 | BA.5.1.30 | 519 (1.7%)  | Passed | Omicron5 |
| September | 22058857 | 22,68 | BA.5.2.1  | 472 (1.6%)  | Passed | Omicron5 |
| September | 22059324 | 22,64 | BA.5.1    | 268 (0.9%)  | Passed | Omicron5 |
| September | 22059551 | 22,57 | BA.5.1.23 | 532 (1.8%)  | Passed | Omicron5 |
| September | 22059092 | 22,56 | BA.5.1    | 70 (0.2%)   | Passed | Omicron5 |
| September | 22060313 | 22,51 | BF.7      | 460 (1.5%)  | Passed | Omicron5 |
| September | 22058826 | 22,44 | BA.5.2    | 456 (1.5%)  | Passed | Omicron5 |
| September | 22060020 | 22,42 | BA.4.6    | 565 (1.9%)  | Passed | Omicron4 |
| September | 22059763 | 22,3  | BA.5.2    | 164 (0.5%)  | Passed | Omicron5 |
| September | 22060101 | 21,99 | BA.5.1.23 | 392 (1.3%)  | Passed | Omicron5 |
| September | 22059661 | 21,91 | BA.5.2.1  | 201 (0.7%)  | Passed | Omicron5 |
| September | 22059934 | 21,75 | BA.5.2.16 | 448 (1.5%)  | Passed | Omicron5 |
| September | 22059087 | 21,47 | BA.5.1    | 226 (0.8%)  | Passed | Omicron5 |
| September | 22058512 | 21,44 | BA.5.1    | 572 (1.9%)  | Passed | Omicron5 |
| September | 22060312 | 21,41 | BA.5.2    | 149 (0.5%)  | Passed | Omicron5 |
| September | 22060099 | 21,19 | BA.5.1.10 | 10 (0.0%)   | Passed | Omicron5 |
| September | 22059668 | 21,02 | BA.5.2.21 | 208 (0.7%)  | Passed | Omicron5 |
| September | 22058984 | 21,01 | BA.5      | 2115 (7.1%) | Failed | Omicron5 |
| September | 22058827 | 20,93 | BA.5.1.30 | 303 (1.0%)  | Passed | Omicron5 |
| September | 22059325 | 20,92 | BA.5.2.1  | 293 (1.0%)  | Passed | Omicron5 |
| September | 22058515 | 20,79 | BA.5.1    | 492 (1.6%)  | Passed | Omicron5 |
| September | 22059922 | 20,77 | BA.4.6    | 105 (0.4%)  | Passed | Omicron4 |
| September | 22058941 | 20,66 | BA.5.2.1  | 284 (1.0%)  | Passed | Omicron5 |
| September | 22058943 | 20,59 | BA.4.4    | 589 (2.0%)  | Passed | Omicron4 |
| September | 22058821 | 20,54 | BA.5.2    | 303 (1.0%)  | Passed | Omicron5 |
| September | 22059086 | 20,45 | BA.5.1    | 300 (1.0%)  | Passed | Omicron5 |
| September | 22060010 | 20,38 | BA.5.2.20 | 115 (0.4%)  | Passed | Omicron5 |
| September | 22058722 | 20,34 | BM.1.1.3  | 294 (1.0%)  | Passed | Omicron2 |
| September | 22058828 | 20,26 | BA.5.1.30 | 306 (1.0%)  | Passed | Omicron5 |
| September | 22060008 | 20,22 | BA.5.1    | 233 (0.8%)  | Passed | Omicron5 |
| September | 22058863 | 20,18 | BE.1      | 301 (1.0%)  | Passed | Omicron5 |
| September | 22059095 | 20,17 | BA.5.1    | 562 (1.9%)  | Passed | Omicron5 |
| September | 22059100 | 20,07 | BA.5.2.1  | 294 (1.0%)  | Passed | Omicron5 |
| September | 22059590 | 19,97 | BA.5.1    | 376 (1.3%)  | Passed | Omicron5 |
| September | 22058861 | 19,95 | BA.5.2.1  | 395 (1.3%)  | Passed | Omicron5 |
| September | 22059593 | 19,92 | BA.5.2.1  | 248 (0.8%)  | Passed | Omicron5 |
| September | 22058720 | 19,75 | BA.5.2.1  | 349 (1.2%)  | Passed | Omicron5 |
| September | 22060213 | 19,73 | BA.5.2    | 191 (0.6%)  | Passed | Omicron5 |
| September | 22059110 | 19,65 | BA.4.1    | 307 (1.0%)  | Passed | Omicron4 |
| September | 22058510 | 19,47 | BA.5.1.10 | 276 (0.9%)  | Passed | Omicron5 |
| September | 22059925 | 19,46 | BA.5.1    | 33 (0.1%)   | Passed | Omicron5 |
| September | 22059592 | 19,39 | BA.5.2.1  | 83 (0.3%)   | Passed | Omicron5 |
| September | 22058823 | 19,38 | BA.5.1.5  | 344 (1.2%)  | Passed | Omicron5 |
| September | 22059594 | 19,33 | BE.1      | 278 (0.9%)  | Passed | Omicron5 |
| September | 22058834 | 19,28 | BA.5.6    | 292 (1.0%)  | Passed | Omicron5 |
| September | 22059101 | 19,27 | BA.5.1    | 582 (2.0%)  | Passed | Omicron5 |
| September | 22058587 | 19,01 | BA.5.1.2  | 308 (1.0%)  | Passed | Omicron5 |
| September | 22059104 | 19,01 | BA.5.2    | 259 (0.9%)  | Passed | Omicron5 |
| September | 22059598 | 18,99 | BF.5      | 36 (0.1%)   | Passed | Omicron5 |
| September | 22058831 | 18,96 | CG.1      | 294 (1.0%)  | Passed | Omicron5 |
| September | 22059850 | 18,61 | BA.5.2.9  | 120 (0.4%)  | Passed | Omicron5 |
| September | 22059549 | 18,6  | BA.5.1.10 | 128 (0.4%)  | Passed | Omicron5 |
| September | 22058568 | 18,58 | BA.5.2.1  | 297 (1.0%)  | Passed | Omicron5 |
| September | 22060330 | 18,52 | BA.5.2.16 | 31 (0.1%)   | Passed | Omicron5 |
| September | 22058992 | 18,48 | BA.5.1.1  | 290 (1.0%)  | Passed | Omicron5 |
| September | 22059552 | 18,26 | BA.5.1.23 | 135 (0.5%)  | Passed | Omicron5 |

|           |          |       |            |               |        |          |
|-----------|----------|-------|------------|---------------|--------|----------|
| September | 22059096 | 18,18 | BA.5.1     | 609 (2.0%)    | Passed | Omicron5 |
| September | 22058927 | 18,16 | BA.4.6.5   | 290 (1.0%)    | Passed | Omicron4 |
| September | 22060103 | 18,11 | BF.7.21    | 66 (0.2%)     | Passed | Omicron5 |
| September | 22059591 | 18,02 | BA.5.2.1   | 17 (0.1%)     | Passed | Omicron5 |
| September | 22059663 | 17,98 | BA.5.2     | 77 (0.3%)     | Passed | Omicron5 |
| September | 22059111 | 17,87 | BA.4.1     | 315 (1.1%)    | Passed | Omicron4 |
| September | 22059336 | 17,84 | BA.5.2.1   | 101 (0.3%)    | Passed | Omicron5 |
| September | 22059666 | 17,83 | BA.5.2.12  | 75 (0.3%)     | Passed | Omicron5 |
| September | 22059964 | 17,75 | BA.4.6     | 248 (0.8%)    | Passed | Omicron4 |
| September | 22059595 | 17,71 | BA.5.1     | 546 (1.8%)    | Passed | Omicron5 |
| September | 22059547 | 17,67 | BA.4.6     | 272 (0.9%)    | Passed | Omicron4 |
| September | 22059103 | 17,61 | BA.5.2.33  | 73 (0.2%)     | Passed | Omicron5 |
| September | 22060100 | 17,56 | BF.5       | 144 (0.5%)    | Passed | Omicron5 |
| September | 22058570 | 17,54 | BA.5.2.1   | 181 (0.6%)    | Passed | Omicron5 |
| September | 22059933 | 17,52 | BA.5.2.16  | 39 (0.1%)     | Passed | Omicron5 |
| September | 22059597 | 17,46 | BA.5.2.2   | 46 (0.2%)     | Passed | Omicron5 |
| September | 22059966 | 17,44 | BA.5.1     | 146 (0.5%)    | Passed | Omicron5 |
| September | 22060316 | 17,38 | BA.5.1.30  | 65 (0.2%)     | Passed | Omicron5 |
| September | 22058991 | 17,19 | BA.5.2     | 85 (0.3%)     | Passed | Omicron5 |
| September | 22058838 | 17,14 | BF.1       | 294 (1.0%)    | Passed | Omicron5 |
| September | 22058858 | 17,12 | BA.5.1     | 467 (1.6%)    | Passed | Omicron5 |
| September | 22058835 | 16,82 | BA.5.6     | 116 (0.4%)    | Passed | Omicron5 |
| September | 22060248 | 16,81 | BA.5.1     | 338 (1.1%)    | Passed | Omicron5 |
| September | 22058925 | 16,76 | BE.1.1     | 63 (0.2%)     | Passed | Omicron5 |
| September | 22058508 | 16,68 | BA.5.1     | 448 (1.5%)    | Passed | Omicron5 |
| September | 22058589 | 16,67 | BA.5.1     | 234 (0.8%)    | Passed | Omicron5 |
| September | 22059783 | 16,66 | BA.5.2.20  | 41 (0.1%)     | Passed | Omicron5 |
| September | 22059112 | 16,64 | BA.4.1     | 298 (1.0%)    | Passed | Omicron4 |
| September | 22058993 | 16,62 | BA.5.1     | 76 (0.3%)     | Passed | Omicron5 |
| September | 22059851 | 16,55 | BA.5.1.22  | 53 (0.2%)     | Passed | Omicron5 |
| September | 22059089 | 16,54 | BA.5.2.1   | 116 (0.4%)    | Passed | Omicron5 |
| September | 22059589 | 16,54 | BA.5.1     | 294 (1.0%)    | Passed | Omicron5 |
| September | 22060246 | 16,4  | BE.1.1     | 68 (0.2%)     | Passed | Omicron5 |
| September | 22059088 | 16,33 | BA.5.1     | 33 (0.1%)     | Passed | Omicron5 |
| September | 22060003 | 16,24 | BA.4.6     | 65 (0.2%)     | Passed | Omicron4 |
| September | 22060250 | 16,07 | BE.1       | 86 (0.3%)     | Passed | Omicron5 |
| September | 22060005 | 16,05 | BA.5.1     | 310 (1.0%)    | Passed | Omicron5 |
| September | 22059662 | 16,03 | BA.5.2.1   | 73 (0.2%)     | Passed | Omicron5 |
| September | 22059105 | 16    | BA.5.1     | 78 (0.3%)     | Passed | Omicron5 |
| September | 22060337 | 15,96 | BA.5.1     | 72 (0.2%)     | Passed | Omicron5 |
| September | 22060009 | 15,85 | BA.5.1     | 68 (0.2%)     | Passed | Omicron5 |
| September | 22060309 | 15,81 | BE.1.1     | 72 (0.2%)     | Passed | Omicron5 |
| September | 22059099 | 15,65 | BA.4.1     | 63 (0.2%)     | Passed | Omicron4 |
| September | 22060307 | 15,62 | BE.1.1     | 68 (0.2%)     | Passed | Omicron5 |
| September | 22058986 | 15,59 | Unassigned | 20663 (69.4%) | Failed | Omicron  |
| September | 22060249 | 15,57 | BA.5.1     | 1041 (3.5%)   | Passed | Omicron5 |
| September | 22060098 | 15,45 | BA.4.6     | 89 (0.3%)     | Passed | Omicron4 |
| September | 22058719 | 15,38 | BA.5.2     | 206 (0.7%)    | Passed | Omicron5 |
| September | 22058819 | 15,33 | BA.5.1.22  | 68 (0.2%)     | Passed | Omicron5 |
| September | 22059108 | 15,22 | BA.5.1     | 76 (0.3%)     | Passed | Omicron5 |
| September | 22059098 | 15,18 | BA.5.1.30  | 27 (0.1%)     | Passed | Omicron5 |
| September | 22060105 | 15,14 | BA.5.2.1   | 75 (0.3%)     | Passed | Omicron5 |
| September | 22059960 | 15,08 | BA.5.1     | 70 (0.2%)     | Passed | Omicron5 |
| September | 22059548 | 15,06 | BA.5.1.10  | 113 (0.4%)    | Passed | Omicron5 |
| September | 22058988 | 15,05 | BF.7       | 75 (0.3%)     | Passed | Omicron5 |
| September | 22060306 | 15    | BA.5.1.10  | 17 (0.1%)     | Passed | Omicron5 |
| September | 22059854 | 14,95 | BE.1       | 68 (0.2%)     | Passed | Omicron5 |
| September | 22059776 | 14,82 | BA.5.2.20  | 46 (0.2%)     | Passed | Omicron5 |
| September | 22059963 | 14,7  | BA.5.2     | 118 (0.4%)    | Passed | Omicron5 |
| September | 22060247 | 14,61 | BE.1.1     | 66 (0.2%)     | Passed | Omicron5 |
| September | 22059967 | 14,41 | BE.1.1     | 73 (0.2%)     | Passed | Omicron5 |

|           |          |       |           |            |        |          |
|-----------|----------|-------|-----------|------------|--------|----------|
| September | 22058513 | 14,28 | BA.5.1    | 523 (1.8%) | Passed | Omicron5 |
| September | 22059939 | 14,09 | BA.5.2.1  | 71 (0.2%)  | Passed | Omicron5 |
| September | 22060251 | 13,92 | BA.5.2    | 68 (0.2%)  | Passed | Omicron5 |
| September | 22060104 | 13,89 | BF.7.21   | 68 (0.2%)  | Passed | Omicron5 |
| September | 22059328 | 13,2  | BA.5.2.18 | 67 (0.2%)  | Passed | Omicron5 |
| September | 22059772 | 13,19 | BA.4.6    | 58 (0.2%)  | Passed | Omicron4 |
| September | 22058507 | 13,17 | BA.5.1    | 439 (1.5%) | Passed | Omicron5 |
| September | 22060218 | 13,15 | BA.5.1    | 283 (0.9%) | Passed | Omicron5 |
| September | 22058514 | 13,09 | BA.5.2.1  | 17 (0.1%)  | Passed | Omicron5 |
| September | 22058591 | 12,94 | BA.5.2    | 78 (0.3%)  | Passed | Omicron5 |
| September | 22060106 | 12,91 | BA.4.6    | 69 (0.2%)  | Passed | Omicron4 |
| September | 22059761 | 12,83 | BA.5.2    | 39 (0.1%)  | Passed | Omicron5 |
| September | 22059329 | 12,79 | BA.5.1    | 22 (0.1%)  | Passed | Omicron5 |
| September | 22058920 | 12,71 | BE.1.1    | 75 (0.3%)  | Passed | Omicron5 |
| September | 22058572 | 12,52 | BA.5.2.16 | 15 (0.1%)  | Passed | Omicron5 |
| September | 22060102 | 12,5  | BA.5.2    | 16 (0.1%)  | Passed | Omicron5 |
| September | 22058856 | 12,43 | BA.5.2    | 66 (0.2%)  | Passed | Omicron5 |
| September | 22059770 | 12,2  | BE.1.1    | 70 (0.2%)  | Passed | Omicron5 |
| September | 22059853 | 11,37 | BE.1      | 68 (0.2%)  | Passed | Omicron5 |
| September | 22058509 | 10,99 | BA.5.1.10 | 70 (0.2%)  | Passed | Omicron5 |



Supplementary Table S5

| Month   | Sample   | Valore CT | Lineage    | N_consensus   | QC_status | Variante     |
|---------|----------|-----------|------------|---------------|-----------|--------------|
| October | 22062430 | 29,92     | BQ.1.1     | 8259 (28.0%)  | Failed    | Omicron5     |
| October | 22060749 | 29,66     | BA.5.1.22  | 581 (2.0%)    | Passed    | Omicron5     |
| October | 22060879 | 29,53     | BA.5.1     | 546 (1.8%)    | Passed    | Omicron5     |
| October | 22062896 | 29,43     | BA.5.2.1   | 109 (0.4%)    | Passed    | Omicron5     |
| October | 22062895 | 29,36     | BF.11      | 8605 (29.1%)  | Failed    | Omicron5     |
| October | 22062440 | 29,18     | Unassigned | 9400 (31.8%)  | Failed    | Omicron      |
| October | 22060750 | 28,59     | BA.5.1.30  | 601 (2.0%)    | Passed    | Omicron5     |
| October | 22064175 | 28,24     | BA.5.1     | 1578 (5.3%)   | Failed    | Omicron5     |
| October | 22060753 | 27,52     | BE.1       | 489 (1.6%)    | Passed    | Omicron5     |
| October | 22062050 | 27,3      | BA.5.1     | 1363 (4.6%)   | Passed    | Omicron5     |
| October | 22060883 | 27,03     | BA.5.1     | 523 (1.8%)    | Passed    | Omicron5     |
| October | 22060886 | 26,44     | BF.4       | 368 (1.2%)    | Passed    | Omicron5     |
| October | 22060880 | 26,42     | BA.5.2     | 307 (1.0%)    | Passed    | Omicron5     |
| October | 22062052 | 26,28     | BF.3       | 1725 (5.8%)   | Failed    | Omicron5     |
| October | 22064446 | 26,19     | BA.5.2.18  | 950 (3.2%)    | Passed    | Omicron5     |
| October | 22062057 | 25,88     | BF.7.4.2   | 1143 (3.8%)   | Passed    | Omicron5     |
| October | 22061344 | 25,84     | BE.1.2     | 2040 (6.8%)   | Failed    | Omicron5     |
| October | 22061861 | 25,83     | BF.7.9     | 1078 (3.6%)   | Passed    | Omicron5     |
| October | 22063133 | 25,78     | BA.5.2.6   | 3232 (10.9%)  | Failed    | Omicron5     |
| October | 22061508 | 25,72     | BQ.1.13    | 1246 (4.2%)   | Passed    | Omicron5     |
| October | 22064231 | 25,55     | XBB        | 662 (2.2%)    | Passed    | Omicron2     |
| October | 22061504 | 25,13     | XBB        | 1436 (4.8%)   | Passed    | Omicron2     |
| October | 22064177 | 24,91     | XBB        | 650 (2.2%)    | Passed    | Omicron2     |
| October | 22061083 | 24,83     | BA.5.1.10  | 1496 (5.0%)   | Failed    | Omicron5     |
| October | 22060951 | 24,74     | BE.1       | 1222 (4.1%)   | Passed    | Omicron5     |
| October | 22062051 | 24,74     | BA.5.2.1   | 693 (2.3%)    | Passed    | Omicron5     |
| October | 22062595 | 24,69     | BF.7       | 341 (1.1%)    | Passed    | Omicron5     |
| October | 22061094 | 24,57     | BF.7       | 1255 (4.2%)   | Passed    | Omicron5     |
| October | 22064146 | 24,55     | BQ.1       | 226 (0.8%)    | Passed    | Omicron5     |
| October | 22061415 | 24,5      | BA.5.1     | 1273 (4.3%)   | Passed    | Omicron5     |
| October | 22061347 | 24,37     | BQ.1       | 1157 (3.9%)   | Passed    | Omicron5     |
| October | 22061048 | 24,29     | BQ.1.10    | 1241 (4.2%)   | Passed    | Omicron5     |
| October | 22062596 | 24,19     | BF.7       | 535 (1.8%)    | Passed    | Omicron5     |
| October | 22062898 | 24,13     | BA.5.1.5   | 2792 (9.4%)   | Failed    | Omicron5     |
| October | 22061089 | 24,1      | XBB        | 1090 (3.7%)   | Passed    | Omicron2     |
| October | 22063815 | 24,03     | BE.1       | 118 (0.4%)    | Passed    | Omicron5     |
| October | 22061343 | 23,96     | BE.1.2     | 1180 (4.0%)   | Passed    | Omicron5     |
| October | 22061159 | 23,8      | BA.5.5     | 1425 (4.8%)   | Passed    | Omicron5     |
| October | 22060754 | 23,62     | BQ.1       | 220 (0.7%)    | Passed    | Omicron5     |
| October | 22062593 | 23,53     | BE.4       | 473 (1.6%)    | Passed    | Omicron5     |
| October | 22064216 | 23,5      | BA.5       | 1508 (5.1%)   | Failed    | Omicron5     |
| October | 22062794 | 23,49     | Unassigned | 10965 (36.8%) | Failed    | Omicron      |
| October | 22062422 | 23,44     | BE.1.1.2   | 116 (0.4%)    | Passed    | Omicron5     |
| October | 22061189 | 23,42     | BA.5.1.10  | 1782 (6.0%)   | Failed    | Omicron5     |
| October | 22061501 | 23,4      | BF.7.8     | 795 (2.7%)    | Passed    | Omicron5     |
| October | 22062449 | 23,35     | BA.5.2.1   | 1243 (4.2%)   | Passed    | Omicron5     |
| October | 22063125 | 23,31     | BA.5.1     | 1945 (6.5%)   | Failed    | Omicron5     |
| October | 22061509 | 23,22     | BF.7.23    | 817 (2.7%)    | Passed    | Omicron5     |
| October | 22062787 | 23,16     | XBB        | 331 (1.1%)    | Passed    | Ricombinante |
| October | 22061081 | 23,13     | BF.5       | 1245 (4.2%)   | Passed    | Omicron5     |
| October | 22061365 | 23,13     | BE.1       | 1109 (3.7%)   | Passed    | Omicron5     |
| October | 22061047 | 23,07     | BA.5.2     | 1445 (4.8%)   | Passed    | Omicron5     |
| October | 22061864 | 22,98     | BF.7.9     | 273 (0.9%)    | Passed    | Omicron5     |
| October | 22062061 | 22,89     | BA.5.1.5   | 322 (1.1%)    | Passed    | Omicron5     |
| October | 22062903 | 22,58     | BF.21      | 1187 (4.0%)   | Passed    | Omicron5     |
| October | 22063322 | 22,53     | BQ.1.1     | 698 (2.3%)    | Passed    | Omicron5     |
| October | 22061416 | 22,48     | BQ.1.1     | 724 (2.4%)    | Passed    | Omicron5     |
| October | 22062453 | 22,46     | BA.5.1.30  | 1056 (3.6%)   | Passed    | Omicron5     |
| October | 22063348 | 22,34     | BQ.1.1     | 1428 (4.8%)   | Passed    | Omicron5     |
| October | 22061413 | 22,32     | BF.7.4.2   | 314 (1.1%)    | Passed    | Omicron5     |
| October | 22062427 | 22,28     | BA.5.2     | 890 (3.0%)    | Passed    | Omicron5     |
| October | 22061411 | 22,08     | BF.14      | 804 (2.7%)    | Passed    | Omicron5     |
| October | 22061113 | 21,94     | BQ.1.13    | 870 (2.9%)    | Passed    | Omicron5     |
| October | 22064186 | 21,89     | BQ.1.1.11  | 125 (0.4%)    | Passed    | Omicron5     |
| October | 22060885 | 21,82     | BF.4       | 271 (0.9%)    | Passed    | Omicron5     |
| October | 22061866 | 21,8      | BA.5.2.1   | 177 (0.6%)    | Passed    | Omicron5     |
| October | 22061412 | 21,73     | XBB.1.4    | 386 (1.3%)    | Passed    | Ricombinante |
| October | 22061593 | 21,7      | BA.5.1     | 629 (2.1%)    | Passed    | Omicron5     |
| October | 22063131 | 21,7      | BQ.1.10    | 1227 (4.1%)   | Passed    | Omicron5     |
| October | 22062900 | 21,68     | BN.3.1     | 1546 (5.2%)   | Failed    | Omicron2     |
| October | 22060770 | 21,56     | BA.5.1     | 229 (0.8%)    | Passed    | Omicron5     |
| October | 22061346 | 21,44     | BQ.1.2     | 847 (2.8%)    | Passed    | Omicron5     |
| October | 22064445 | 21,44     | BA.5.2     | 508 (1.7%)    | Passed    | Omicron5     |
| October | 22062054 | 21,37     | BQ.1.10    | 357 (1.2%)    | Passed    | Omicron5     |
| October | 22062901 | 21,31     | BA.5.1.30  | 1114 (3.7%)   | Passed    | Omicron5     |
| October | 22060755 | 21,3      | BF.7.6     | 265 (0.9%)    | Passed    | Omicron5     |
| October | 22061096 | 21,3      | BA.5.2.38  | 478 (1.6%)    | Passed    | Omicron5     |
| October | 22061592 | 21,25     | BA.5.1     | 755 (2.5%)    | Passed    | Omicron5     |
| October | 22060948 | 21,15     | BF.39      | 791 (2.7%)    | Passed    | Omicron5     |
| October | 22061351 | 21,06     | BE.4.1     | 536 (1.8%)    | Passed    | Omicron5     |
| October | 22061505 | 20,89     | BF.10      | 513 (1.7%)    | Passed    | Omicron5     |
| October | 22063326 | 20,86     | BF.7       | 316 (1.1%)    | Passed    | Omicron5     |
| October | 22061500 | 20,79     | BA.5.1     | 691 (2.3%)    | Passed    | Omicron5     |
| October | 22061469 | 20,74     | BA.5.2.20  | 384 (1.3%)    | Passed    | Omicron5     |
| October | 22061865 | 20,7      | BA.5.2     | 74 (0.2%)     | Passed    | Omicron5     |
| October | 22064181 | 20,58     | BQ.1       | 272 (0.9%)    | Passed    | Omicron5     |
| October | 22061506 | 20,55     | BE.1       | 435 (1.5%)    | Passed    | Omicron5     |
| October | 22063823 | 20,48     | BA.5.1.23  | 290 (1.0%)    | Passed    | Omicron5     |
| October | 22060748 | 20,46     | BF.3       | 4295 (14.4%)  | Failed    | Omicron5     |
| October | 22060949 | 20,43     | BF.11      | 470 (1.6%)    | Passed    | Omicron5     |
| October | 22061594 | 20,15     | BA.5.1     | 554 (1.9%)    | Passed    | Omicron5     |
| October | 22061862 | 20,15     | BA.5       | 102 (0.3%)    | Passed    | Omicron5     |
| October | 22062417 | 20,12     | BQ.1.1     | 299 (1.0%)    | Passed    | Omicron5     |
| October | 22063349 | 20,02     | BA.5.2     | 109 (0.4%)    | Passed    | Omicron5     |
| October | 22061049 | 19,97     | BA.4.6     | 491 (1.6%)    | Passed    | Omicron4     |
| October | 22063329 | 19,83     | XBB.1      | 117 (0.4%)    | Passed    | Ricombinante |
| October | 22063338 | 19,79     | BQ.1.1     | 267 (0.9%)    | Passed    | Omicron5     |
| October | 22061161 | 19,56     | BF.3       | 697 (2.3%)    | Passed    | Omicron5     |

|         |          |       |            |               |        |              |
|---------|----------|-------|------------|---------------|--------|--------------|
| October | 22064440 | 19,53 | BF.7.21    | 300 (1.0%)    | Passed | Omicron5     |
| October | 22063130 | 19,49 | BA.5.2.1   | 113 (0.4%)    | Passed | Omicron5     |
| October | 22061163 | 19,47 | BA.5.1     | 238 (0.8%)    | Passed | Omicron5     |
| October | 22063339 | 19,46 | BQ.1.1     | 106 (0.4%)    | Passed | Omicron5     |
| October | 22064223 | 19,34 | BQ.1.10    | 177 (0.6%)    | Passed | Omicron5     |
| October | 22064198 | 19,23 | BA.5.2     | 4387 (14.7%)  | Failed | Omicron5     |
| October | 22063331 | 19,17 | BQ.1.2     | 117 (0.4%)    | Passed | Omicron5     |
| October | 22061596 | 19,14 | BA.2.75.2  | 271 (0.9%)    | Passed | Omicron2     |
| October | 22063817 | 19,09 | BA.5.2.1   | 56 (0.2%)     | Passed | Omicron5     |
| October | 22064165 | 19,05 | Unassigned | 9481 (31.8%)  | Failed | Omicron      |
| October | 22064182 | 18,95 | BA.5.2     | 250 (0.8%)    | Passed | Omicron5     |
| October | 22061088 | 18,83 | BQ.1.10    | 483 (1.6%)    | Passed | Omicron5     |
| October | 22061868 | 18,83 | BA.5.2     | 83 (0.3%)     | Passed | Omicron5     |
| October | 22061863 | 18,81 | BA.5       | 74 (0.2%)     | Passed | Omicron5     |
| October | 22061591 | 18,74 | BQ.1       | 501 (1.7%)    | Passed | Omicron5     |
| October | 22064441 | 18,71 | BF.3       | 262 (0.9%)    | Passed | Omicron5     |
| October | 22060944 | 18,64 | BA.5.2     | 322 (1.1%)    | Passed | Omicron5     |
| October | 22062902 | 18,56 | BL.2       | 113 (0.4%)    | Passed | Omicron2     |
| October | 22061053 | 18,51 | BA.5.2     | 300 (1.0%)    | Passed | Omicron5     |
| October | 22064180 | 18,5  | BA.5.2.58  | 22 (0.1%)     | Passed | Omicron5     |
| October | 22062435 | 18,37 | BF.7       | 35 (0.1%)     | Passed | Omicron5     |
| October | 22064238 | 18,31 | BQ.1.1.4   | 70 (0.2%)     | Passed | Omicron5     |
| October | 22061160 | 18,28 | BA.5.5     | 174 (0.6%)    | Passed | Omicron5     |
| October | 22063814 | 18,24 | BQ.1.1.5   | 20 (0.1%)     | Passed | Omicron5     |
| October | 22061595 | 18,23 | BF.5       | 368 (1.2%)    | Passed | Omicron5     |
| October | 22064444 | 18,17 | BF.7.10    | 7633 (25.9%)  | Failed | Omicron5     |
| October | 22062789 | 18,08 | BA.5.1     | 442 (1.5%)    | Passed | Omicron5     |
| October | 22062418 | 18,01 | BF.7.5     | 77 (0.3%)     | Passed | Omicron5     |
| October | 22062790 | 18    | BA.5.2     | 118 (0.4%)    | Passed | Omicron5     |
| October | 22061867 | 17,98 | BA.5.2     | 120 (0.4%)    | Passed | Omicron5     |
| October | 22061045 | 17,95 | BE.1       | 221 (0.7%)    | Passed | Omicron5     |
| October | 22060756 | 17,83 | Unassigned | 10164 (34.1%) | Failed | Omicron      |
| October | 22064174 | 17,83 | BQ.1.15    | 275 (0.9%)    | Passed | Omicron5     |
| October | 22063126 | 17,62 | XBB.1.4    | 118 (0.4%)    | Passed | Ricombinante |
| October | 22063821 | 17,46 | BA.5.1     | 118 (0.4%)    | Passed | Omicron5     |
| October | 22061051 | 17,45 | BA.4.6     | 294 (1.0%)    | Passed | Omicron4     |
| October | 22061600 | 17,38 | BA.5.1.23  | 291 (1.0%)    | Passed | Omicron5     |
| October | 22064442 | 17,24 | BQ.1.1     | 300 (1.0%)    | Passed | Omicron5     |
| October | 22063818 | 16,97 | BQ.1.1     | 64 (0.2%)     | Passed | Omicron5     |
| October | 22061085 | 16,93 | BF.11      | 84 (0.3%)     | Passed | Omicron5     |
| October | 22063124 | 16,92 | BQ.1.1.15  | 49 (0.2%)     | Passed | Omicron5     |
| October | 22060884 | 16,89 | BA.5.2     | 80 (0.3%)     | Passed | Omicron5     |
| October | 22061044 | 16,81 | BQ.1       | 22 (0.1%)     | Passed | Omicron5     |
| October | 22060752 | 16,79 | BQ.1.1     | 52 (0.2%)     | Passed | Omicron5     |
| October | 22061507 | 16,77 | BE.1       | 118 (0.4%)    | Passed | Omicron5     |
| October | 22062060 | 16,7  | BA.5.1     | 76 (0.3%)     | Passed | Omicron5     |
| October | 22062600 | 16,65 | BF.7       | 18 (0.1%)     | Passed | Omicron5     |
| October | 22061468 | 16,59 | BQ.1.15    | 78 (0.3%)     | Passed | Omicron5     |
| October | 22060776 | 16,41 | BF.14      | 183 (0.6%)    | Passed | Omicron5     |
| October | 22061190 | 16,31 | BQ.1.1     | 41 (0.1%)     | Passed | Omicron5     |
| October | 22064173 | 16,29 | BA.5.1     | 77 (0.3%)     | Passed | Omicron5     |
| October | 22063128 | 16,28 | BQ.1.2     | 84 (0.3%)     | Passed | Omicron5     |
| October | 22061046 | 16,24 | BA.5.1     | 345 (1.2%)    | Passed | Omicron5     |
| October | 22061502 | 16,23 | BL.2       | 424 (1.4%)    | Passed | Omicron2     |
| October | 22064443 | 16,19 | BM.1.1.3   | 692 (2.3%)    | Passed | Omicron2     |
| October | 22064229 | 16,16 | BA.5.2.1   | 2428 (8.1%)   | Failed | Omicron5     |
| October | 22061087 | 16,12 | BQ.1.10    | 551 (1.8%)    | Passed | Omicron5     |
| October | 22061414 | 16,07 | BA.5.2     | 77 (0.3%)     | Passed | Omicron5     |
| October | 22060946 | 16,02 | XBB.1.4    | 118 (0.4%)    | Passed | Ricombinante |
| October | 22061410 | 15,52 | BF.5       | 25 (0.1%)     | Passed | Omicron5     |
| October | 22060887 | 15,46 | BE.1       | 118 (0.4%)    | Passed | Omicron5     |
| October | 22061860 | 15,24 | BA.5.2     | 24 (0.1%)     | Passed | Omicron5     |
| October | 22061340 | 15,23 | BQ.1.1.3   | 26 (0.1%)     | Passed | Omicron5     |
| October | 22062897 | 14,92 | BA.5.1     | 119 (0.4%)    | Passed | Omicron5     |
| October | 22064220 | 14,9  | BF.7.26    | 37 (0.1%)     | Passed | Omicron5     |
| October | 22064439 | 14,78 | BA.5.2.16  | 101 (0.3%)    | Passed | Omicron5     |
| October | 22062788 | 14,73 | XBB.1.4    | 22 (0.1%)     | Passed | Ricombinante |
| October | 22062419 | 14,69 | BA.5.1.5   | 79 (0.3%)     | Passed | Omicron5     |
| October | 22060945 | 14,67 | XBB.1.4    | 63 (0.2%)     | Passed | Ricombinante |
| October | 22060881 | 14,59 | BF.5       | 65 (0.2%)     | Passed | Omicron5     |
| October | 22061859 | 14,49 | BA.5.2     | 59 (0.2%)     | Passed | Omicron5     |
| October | 22063822 | 14,48 | BQ.1.1     | 69 (0.2%)     | Passed | Omicron5     |
| October | 22061105 | 14,37 | BA.4.6     | 64 (0.2%)     | Passed | Omicron4     |
| October | 22061597 | 14,24 | BA.5.1     | 88 (0.3%)     | Passed | Omicron5     |
| October | 22063324 | 14,21 | BA.5.2     | 75 (0.3%)     | Passed | Omicron5     |
| October | 22061166 | 14,13 | BA.5.1     | 53 (0.2%)     | Passed | Omicron5     |
| October | 22061409 | 14,12 | BA.5.1     | 16 (0.1%)     | Passed | Omicron5     |
| October | 22061349 | 14,05 | BA.5.2.1   | 19 (0.1%)     | Passed | Omicron5     |
| October | 22063819 | 14,05 | BA.5.1     | 63 (0.2%)     | Passed | Omicron5     |
| October | 22064218 | 13,88 | BA.5.1     | 1795 (6.0%)   | Failed | Omicron5     |
| October | 22060947 | 13,77 | BQ.1.1     | 52 (0.2%)     | Passed | Omicron5     |
| October | 22061158 | 13,47 | BQ.1.10    | 68 (0.2%)     | Passed | Omicron5     |
| October | 22064183 | 13,39 | BA.5.2     | 68 (0.2%)     | Passed | Omicron5     |
| October | 22062792 | 13,38 | BA.5.2     | 39 (0.1%)     | Passed | Omicron5     |
| October | 22062049 | 13,23 | BA.5.1     | 54 (0.2%)     | Passed | Omicron5     |
| October | 22063127 | 13,06 | BF.7.6     | 72 (0.2%)     | Passed | Omicron5     |
| October | 22063820 | 12,8  | BA.5.1     | 73 (0.2%)     | Passed | Omicron5     |
| October | 22062791 | 12,56 | BA.5.2     | 82 (0.3%)     | Passed | Omicron5     |
| October | 22061503 | 12,51 | BQ.1.2     | 70 (0.2%)     | Passed | Omicron5     |
| October | 22061598 | 12,39 | BA.5.1.10  | 24 (0.1%)     | Passed | Omicron5     |
| October | 22061052 | 12,35 | BF.10      | 339 (1.1%)    | Passed | Omicron5     |
| October | 22061050 | 11,68 | BA.4.6     | 70 (0.2%)     | Passed | Omicron4     |
| October | 22063129 | 11,67 | BQ.1.1     | 55 (0.2%)     | Passed | Omicron5     |
| October | 22061157 | 11,45 | BQ.1.10    | 91 (0.3%)     | Passed | Omicron5     |

Supplementary Table S6

| Month    | Sample   | Valore CT | Lineage    | N consensus   | QC status | Variante     |
|----------|----------|-----------|------------|---------------|-----------|--------------|
| November | 22065829 | 30,91     | BA.5       | 2666 (9.0%)   | Failed    | Omicron5     |
| November | 22067583 | 28,73     | BA.2.10.1  | 1119 (3.8%)   | Passed    | Omicron2     |
| November | 22065438 | 27,69     | BA.5.2     | 4428 (14.9%)  | Failed    | Omicron5     |
| November | 22069518 | 27,66     | BA.5.1.10  | 1430 (4.8%)   | Passed    | Omicron5     |
| November | 22064777 | 27,64     | BA.5.9     | 1219 (4.1%)   | Passed    | Omicron5     |
| November | 22069513 | 27,42     | XBB        | 723 (2.4%)    | Passed    | Omicron2     |
| November | 22067585 | 27,27     | BF.7.6     | 723 (2.4%)    | Passed    | Omicron5     |
| November | 22065704 | 27,2      | BA.5.1.10  | 384 (1.3%)    | Passed    | Omicron5     |
| November | 22068109 | 26,96     | XBB        | 709 (2.4%)    | Passed    | Omicron2     |
| November | 22068111 | 26,85     | XBB        | 583 (2.0%)    | Passed    | Omicron2     |
| November | 22064772 | 26,7      | BQ.1       | 817 (2.7%)    | Passed    | Omicron5     |
| November | 22065717 | 26,59     | BN.1.3     | 855 (2.9%)    | Passed    | Omicron2     |
| November | 22065706 | 26,27     | BQ.1       | 726 (2.4%)    | Passed    | Omicron5     |
| November | 22065739 | 26,23     | BA.5.1     | 666 (2.2%)    | Passed    | Omicron5     |
| November | 22065701 | 26,17     | BA.5.1.10  | 633 (2.1%)    | Passed    | Omicron5     |
| November | 22067586 | 25,99     | BQ.1       | 419 (1.4%)    | Passed    | Omicron5     |
| November | 22069060 | 25,87     | BQ.1.1     | 531 (1.8%)    | Passed    | Omicron5     |
| November | 22068091 | 25,68     | BA.5.2.1   | 630 (2.1%)    | Passed    | Omicron5     |
| November | 22069045 | 25,28     | XBB.1.4    | 870 (2.9%)    | Passed    | Omicron2     |
| November | 22065977 | 25,22     | BQ.1.1     | 1739 (5.8%)   | Failed    | Omicron5     |
| November | 22064944 | 25,18     | BQ.1.1.11  | 1729 (5.8%)   | Failed    | Omicron5     |
| November | 22065727 | 25,11     | BA.5.9     | 545 (1.8%)    | Passed    | Omicron5     |
| November | 22065713 | 25,07     | BQ.1       | 480 (1.6%)    | Passed    | Omicron5     |
| November | 22065720 | 24,94     | BA.5.9     | 601 (2.0%)    | Passed    | Omicron5     |
| November | 22067263 | 24,82     | XBB.1.4    | 546 (1.8%)    | Passed    | Ricombinante |
| November | 22069512 | 24,76     | XBB.1.4    | 607 (2.0%)    | Passed    | Ricombinante |
| November | 22065707 | 24,62     | BF.7       | 556 (1.9%)    | Passed    | Omicron5     |
| November | 22068161 | 24,5      | BA.5.2     | 296 (1.0%)    | Passed    | Omicron5     |
| November | 22065496 | 24,4      | BQ.1.1     | 1371 (4.6%)   | Passed    | Omicron5     |
| November | 22065818 | 24,32     | XBB        | 672 (2.3%)    | Passed    | Omicron2     |
| November | 22069521 | 24,22     | BF.7       | 422 (1.4%)    | Passed    | Omicron5     |
| November | 22065733 | 24,13     | DB.2       | 230 (0.8%)    | Passed    | Omicron5     |
| November | 22067264 | 24,02     | BA.5.1     | 2112 (7.1%)   | Failed    | Omicron5     |
| November | 22068482 | 23,54     | XBF        | 2803 (9.4%)   | Failed    | Ricombinante |
| November | 22065740 | 23,4      | XBB.1.4    | 296 (1.0%)    | Passed    | Ricombinante |
| November | 22064773 | 23,37     | BQ.1.1.47  | 304 (1.0%)    | Passed    | Omicron5     |
| November | 22068479 | 22,91     | BQ.1.1     | 638 (2.1%)    | Passed    | Omicron5     |
| November | 22069051 | 22,67     | BF.7       | 870 (2.9%)    | Passed    | Omicron5     |
| November | 22065827 | 22,65     | BQ.1       | 324 (1.1%)    | Passed    | Omicron5     |
| November | 22069517 | 22,47     | BQ.1.1     | 238 (0.8%)    | Passed    | Omicron5     |
| November | 22069514 | 22,42     | BM.1.1.3   | 358 (1.2%)    | Passed    | Omicron2     |
| November | 22068489 | 22,3      | BQ.1.1.3   | 817 (2.7%)    | Passed    | Omicron5     |
| November | 22065760 | 22,28     | BQ.1.1.23  | 570 (1.9%)    | Passed    | Omicron5     |
| November | 22067261 | 22,25     | BQ.1.1.18  | 279 (0.9%)    | Passed    | Omicron5     |
| November | 22069520 | 22,25     | BQ.1.1     | 271 (0.9%)    | Passed    | Omicron5     |
| November | 22069043 | 22,08     | BF.27      | 587 (2.0%)    | Passed    | Omicron5     |
| November | 22064774 | 21,92     | BQ.1       | 242 (0.8%)    | Passed    | Omicron5     |
| November | 22067460 | 21,76     | CK.2.1     | 183 (0.6%)    | Passed    | Omicron5     |
| November | 22064986 | 21,32     |            |               |           |              |
| November | 22067262 | 21,2      | XBB.1      | 195 (0.7%)    | Passed    | Ricombinante |
| November | 22065725 | 21,06     | XBB.1.4    | 74 (0.2%)     | Passed    | Ricombinante |
| November | 22065814 | 20,97     | BA.5.1     | 1007 (3.4%)   | Passed    | Omicron5     |
| November | 22065750 | 20,92     | BQ.1.1.18  | 173 (0.6%)    | Passed    | Omicron5     |
| November | 22067587 | 20,8      | BQ.1.1.18  | 118 (0.4%)    | Passed    | Omicron5     |
| November | 22069054 | 20,61     | BQ.1.1     | 875 (2.9%)    | Passed    | Omicron5     |
| November | 22065440 | 20,57     | BF.3       | 1026 (3.4%)   | Passed    | Omicron5     |
| November | 22069052 | 20,56     | BF.7       | 678 (2.3%)    | Passed    | Omicron5     |
| November | 22065721 | 20,35     | XBB.1      | 308 (1.0%)    | Passed    | Ricombinante |
| November | 22065761 | 20,26     | BQ.1.1.23  | 158 (0.5%)    | Passed    | Omicron5     |
| November | 22066027 | 20,25     | BQ.1.1     | 1026 (3.4%)   | Passed    | Omicron5     |
| November | 22067457 | 20,2      | BA.5.2.1   | 275 (0.9%)    | Passed    | Omicron5     |
| November | 22067588 | 20,19     | BQ.1.1.18  | 155 (0.5%)    | Passed    | Omicron5     |
| November | 22064947 | 20,11     |            |               |           |              |
| November | 22068088 | 20,06     | XBB.1.4    | 122 (0.4%)    | Passed    | Ricombinante |
| November | 22067584 | 20        | BQ.1.1.18  | 17 (0.1%)     | Passed    | Omicron5     |
| November | 22065813 | 19,73     | BA.5.2.1   | 622 (2.1%)    | Passed    | Omicron5     |
| November | 22065743 | 19,68     | BE.4.1     | 220 (0.7%)    | Passed    | Omicron5     |
| November | 22069074 | 19,6      | BN.1.3.1   | 2093 (7.0%)   | Failed    | Omicron2     |
| November | 22069044 | 19,54     | BF.7       | 682 (2.3%)    | Passed    | Omicron5     |
| November | 22064769 | 19,51     | XBB.1.4    | 291 (1.0%)    | Passed    | Ricombinante |
| November | 22065988 | 19,49     | BF.14      | 693 (2.3%)    | Passed    | Omicron5     |
| November | 22065746 | 19,45     | XBB.1.4    | 172 (0.6%)    | Passed    | Ricombinante |
| November | 22065731 | 19,3      | DB.2       | 120 (0.4%)    | Passed    | Omicron5     |
| November | 22067458 | 19,25     | CL.1.3     | 318 (1.1%)    | Passed    | Omicron5     |
| November | 22068100 | 19,21     | BQ.1.1     | 89 (0.3%)     | Passed    | Omicron5     |
| November | 22065756 | 19,08     | BQ.1.1.23  | 308 (1.0%)    | Passed    | Omicron5     |
| November | 22065451 | 19,05     | BF.7       | 610 (2.0%)    | Passed    | Omicron5     |
| November | 22065982 | 19,04     | CQ.1       | 584 (2.0%)    | Passed    | Omicron5     |
| November | 22065744 | 19,02     | BQ.1.1     | 612 (2.1%)    | Passed    | Omicron5     |
| November | 22064771 | 18,66     | Unassigned | 12321 (41.3%) | Failed    | Omicron      |
| November | 22066025 | 18,57     | BA.5.2     | 215 (0.7%)    | Passed    | Omicron5     |
| November | 22065702 | 18,39     | XBB.1.4    | 117 (0.4%)    | Passed    | Ricombinante |
| November | 22065755 | 18,3      | BQ.1.1     | 162 (0.5%)    | Passed    | Omicron5     |
| November | 22065711 | 18,1      | BF.5       | 64 (0.2%)     | Passed    | Omicron5     |
| November | 22065759 | 18,1      | BQ.1.1.29  | 31 (0.1%)     | Passed    | Omicron5     |
| November | 22065735 | 18,09     | BQ.1.1.3   | 49 (0.2%)     | Passed    | Omicron5     |
| November | 22065439 | 18,08     | BN.1.3.1   | 2833 (9.5%)   | Failed    | Omicron2     |
| November | 22065506 | 18,08     | BQ.1.1     | 705 (2.4%)    | Passed    | Omicron5     |
| November | 22065728 | 18,04     | BA.5.9     | 118 (0.4%)    | Passed    | Omicron5     |
| November | 22067252 | 18,01     | BA.5.1.10  | 119 (0.4%)    | Passed    | Omicron5     |
| November | 22064795 | 17,98     | XBB.1.4    | 220 (0.7%)    | Passed    | Ricombinante |
| November | 22064951 | 17,93     |            |               |           |              |
| November | 22069519 | 17,88     | BQ.1.1     | 154 (0.5%)    | Passed    | Omicron5     |
| November | 22067466 | 17,77     | BQ.1.1.3   | 13 (0.0%)     | Passed    | Omicron5     |
| November | 22065708 | 17,76     | BF.7       | 394 (1.3%)    | Passed    | Omicron5     |
| November | 22068095 | 17,75     | BQ.1.1     | 108 (0.4%)    | Passed    | Omicron5     |
| November | 22065741 | 17,71     | BE.4.2     | 150 (0.5%)    | Passed    | Omicron5     |
| November | 22064770 | 17,67     | BA.5.1     | 316 (1.1%)    | Passed    | Omicron5     |
| November | 22065714 | 17,67     | BA.5.1     | 18 (0.1%)     | Passed    | Omicron5     |
| November | 22067461 | 17,49     | CL.1.3     | 69 (0.2%)     | Passed    | Omicron5     |
| November | 22067255 | 17,45     | BN.1.3.1   | 279 (0.9%)    | Passed    | Omicron2     |
| November | 22067590 | 17,39     | BF.7.4.2   | 68 (0.2%)     | Passed    | Omicron5     |
| November | 22065736 | 17,24     | BQ.1.1     | 69 (0.2%)     | Passed    | Omicron5     |
| November | 22067251 | 17,24     | BA.5.1.10  | 63 (0.2%)     | Passed    | Omicron5     |
| November | 22069073 | 17,18     | BQ.1.1.6   | 576 (1.9%)    | Passed    | Omicron5     |

|          |          |       |           |             |        |              |
|----------|----------|-------|-----------|-------------|--------|--------------|
| November | 22065703 | 17,05 | BF.5      | 116 (0.4%)  | Passed | Omicron5     |
| November | 22065724 | 17,03 | BQ.1      | 16 (0.1%)   | Passed | Omicron5     |
| November | 22069515 | 16,67 | BM.1.1.3  | 400 (1.3%)  | Passed | Omicron2     |
| November | 22065705 | 16,62 | BF.7      | 191 (0.6%)  | Passed | Omicron5     |
| November | 22065738 | 16,54 | BN.1.3    | 314 (1.1%)  | Passed | Omicron2     |
| November | 22065710 | 16,49 | EQ.1      | 17 (0.1%)   | Passed | Omicron5     |
| November | 22065734 | 16,49 | XBB.1.4   | 76 (0.3%)   | Passed | Ricombinante |
| November | 22068480 | 16,48 | BF.7.1    | 555 (1.9%)  | Passed | Omicron5     |
| November | 22065729 | 16,2  | BA.5.1    | 485 (1.6%)  | Passed | Omicron5     |
| November | 22064941 | 16,14 | XBB.1.4   | 733 (2.5%)  | Passed | Ricombinante |
| November | 22065445 | 15,94 | BA.5.1.10 | 717 (2.4%)  | Passed | Omicron5     |
| November | 22068486 | 15,88 | XBF       | 1033 (3.5%) | Passed | Ricombinante |
| November | 22064945 | 15,82 |           |             |        |              |
| November | 22065715 | 15,78 | BQ.1.1    | 15 (0.1%)   | Passed | Omicron5     |
| November | 22068089 | 15,74 | BQ.1.1    | 36 (0.1%)   | Passed | Omicron5     |
| November | 22065723 | 15,72 | BQ.1.1    | 22 (0.1%)   | Passed | Omicron5     |
| November | 22067582 | 15,41 | XBB.1.4   | 69 (0.2%)   | Passed | Ricombinante |
| November | 22067250 | 15,25 | BA.5.2    | 67 (0.2%)   | Passed | Omicron5     |
| November | 22064942 | 15,13 |           |             |        |              |
| November | 22065712 | 15,11 | BM.1.1.3  | 267 (0.9%)  | Passed | Omicron2     |
| November | 22065719 | 15,01 | BA.5.9    | 27 (0.1%)   | Passed | Omicron5     |
| November | 22065752 | 14,91 | BF.3      | 19 (0.1%)   | Passed | Omicron5     |
| November | 22065749 | 14,83 | XBB.1.4   | 20 (0.1%)   | Passed | Ricombinante |
| November | 22065732 | 14,77 | XBB.1.4   | 68 (0.2%)   | Passed | Ricombinante |
| November | 22064775 | 14,68 | BA.5.2    | 65 (0.2%)   | Passed | Omicron5     |
| November | 22065737 | 14,64 | BF.5      | 68 (0.2%)   | Passed | Omicron5     |
| November | 22065709 | 14,62 | BF.10     | 74 (0.2%)   | Passed | Omicron5     |
| November | 22064956 | 14,6  |           |             |        |              |
| November | 22069053 | 14,52 | XBB.1.4   | 156 (0.5%)  | Passed | Ricombinante |
| November | 22064768 | 14,5  | BN.1.3    | 484 (1.6%)  | Passed | Omicron2     |
| November | 22068492 | 14,33 | BF.7      | 93 (0.3%)   | Passed | Omicron5     |
| November | 22065833 | 14,32 | BF.11     | 71 (0.2%)   | Passed | Omicron5     |
| November | 22065745 | 14,19 | XBB.1.4   | 12 (0.0%)   | Passed | Ricombinante |
| November | 22065753 | 14,16 | XBB.1.4   | 112 (0.4%)  | Passed | Ricombinante |
| November | 22065441 | 13,99 | BF.7      | 412 (1.4%)  | Passed | Omicron5     |
| November | 22068488 | 13,88 | BA.5.2.18 | 68 (0.2%)   | Passed | Omicron5     |
| November | 22065810 | 13,81 | BF.7.4.2  | 118 (0.4%)  | Passed | Omicron5     |
| November | 22065444 | 13,58 | BA.5.1.10 | 610 (2.0%)  | Passed | Omicron5     |
| November | 22065747 | 13,57 | BQ.1.1    | 14 (0.0%)   | Passed | Omicron5     |
| November | 22065751 | 13,44 | BF.7      | 68 (0.2%)   | Passed | Omicron5     |
| November | 22064943 | 13,41 |           |             |        |              |
| November | 22068481 | 13,06 | BN.1.3    | 652 (2.2%)  | Passed | Omicron2     |
| November | 22068487 | 13,02 | BQ.1.15   | 286 (1.0%)  | Passed | Omicron5     |
| November | 22065742 | 12,82 | BF.7.9    | 21 (0.1%)   | Passed | Omicron5     |
| November | 22065718 | 12,72 | BQ.1.1    | 69 (0.2%)   | Passed | Omicron5     |
| November | 22065722 | 12,67 | BQ.1.1    | 35 (0.1%)   | Passed | Omicron5     |
| November | 22065757 | 12,65 | BM.1.1    | 276 (0.9%)  | Passed | Omicron2     |
| November | 22067254 | 12,63 | BQ.1.13   | 38 (0.1%)   | Passed | Omicron5     |
| November | 22065816 | 12,48 | BQ.1.1.18 | 76 (0.3%)   | Passed | Omicron5     |
| November | 22067259 | 12,48 | XBB.1.4   | 68 (0.2%)   | Passed | Ricombinante |
| November | 22065843 | 12,33 | BF.5      | 41 (0.1%)   | Passed | Omicron5     |
| November | 22065758 | 12,3  | XBB.1.4   | 78 (0.3%)   | Passed | Ricombinante |
| November | 22065716 | 11,53 | BQ.1.10   | 68 (0.2%)   | Passed | Omicron5     |
| November | 22065754 | 11,2  | XBB.1.4   | 69 (0.2%)   | Passed | Ricombinante |
| November | 22065726 | 10,97 | BQ.1.2    | 68 (0.2%)   | Passed | Omicron5     |
| November | 22068491 | 10,48 | BF.7      | 129 (0.4%)  | Passed | Omicron5     |
| November | 22065437 | 10,27 | BQ.1.1    | 14 (0.0%)   | Passed | Omicron5     |

Supplementary Table S7

| Month    | Sample   | Valore CT | Lineage   | N_consensus  | QC_status | Variante     |
|----------|----------|-----------|-----------|--------------|-----------|--------------|
| December | 22071669 | 28,62     | BA.2      | 3913 (13.1%) | Failed    | Omicron2     |
| December | 22070197 | 28,2      | BA.5      | 7951 (26.6%) | Failed    | Omicron5     |
| December | 22071670 | 28,1      | XBB.1.4   | 1223 (4.1%)  | Passed    | Ricombinante |
| December | 22071660 | 28        | BE.1.1    | 1740 (5.8%)  | Failed    | Omicron5     |
| December | 22071627 | 27,96     | BQ.1      | 1544 (5.2%)  | Failed    | Omicron5     |
| December | 22072524 | 27,48     | BQ.1      | 1570 (5.3%)  | Failed    | Omicron5     |
| December | 22070787 | 27,36     | BQ.1      | 2107 (7.1%)  | Failed    | Omicron5     |
| December | 22071651 | 27,13     | BF.7      | 1203 (4.0%)  | Passed    | Omicron5     |
| December | 22071630 | 27,06     | BQ.1.1    | 1240 (4.2%)  | Passed    | Omicron5     |
| December | 22071629 | 26,84     | BQ.1      | 1435 (4.8%)  | Passed    | Omicron5     |
| December | 22072839 | 26,66     | BA.5.2.1  | 760 (2.6%)   | Passed    | Omicron5     |
| December | 22071668 | 26,62     | XBB.1.4   | 881 (3.0%)   | Passed    | Omicron2     |
| December | 22071658 | 26,55     | BA.5.2.47 | 781 (2.6%)   | Passed    | Omicron5     |
| December | 22072832 | 26,31     | BA.2      | 905 (3.0%)   | Passed    | Ricombinante |
| December | 22070801 | 26,13     | BQ.1      | 3270 (11.0%) | Failed    | Omicron5     |
| December | 22071662 | 25,8      | BA.5      | 5406 (18.1%) | Failed    | Omicron5     |
| December | 22070191 | 25,79     | XBF       | 1148 (3.9%)  | Passed    | Ricombinante |
| December | 22071672 | 25,51     | BQ.1      | 1055 (3.5%)  | Passed    | Omicron5     |
| December | 22071654 | 25,32     | BQ.1.13.1 | 1158 (3.9%)  | Passed    | Omicron5     |
| December | 22071641 | 25,21     | BF.7.1    | 761 (2.6%)   | Passed    | Omicron5     |
| December | 22071677 | 24,87     | BQ.1      | 870 (2.9%)   | Passed    | Omicron5     |
| December | 22072526 | 24,78     | BQ.1      | 1095 (3.7%)  | Passed    | Omicron5     |
| December | 22071656 | 24,53     | XBB.1.4   | 2244 (7.5%)  | Failed    | Ricombinante |
| December | 22071671 | 24,52     | BQ.1.1    | 587 (2.0%)   | Passed    | Omicron5     |
| December | 22070687 | 24,21     | BN.1.3.1  | 1668 (5.6%)  | Failed    | Omicron2     |
| December | 22070791 | 23,93     | BF.7      | 1161 (3.9%)  | Passed    | Omicron5     |
| December | 22070783 | 23,6      | BQ.1.1    | 1070 (3.6%)  | Passed    | Omicron5     |
| December | 22072527 | 23,19     | BQ.1      | 1383 (4.6%)  | Passed    | Omicron5     |
| December | 22071644 | 22,74     | BQ.1      | 660 (2.2%)   | Passed    | Omicron5     |
| December | 22071621 | 22,47     | BF.7      | 647 (2.2%)   | Passed    | Omicron5     |
| December | 22071614 | 22,14     | BQ.1.1    | 441 (1.5%)   | Passed    | Omicron5     |
| December | 22072529 | 22,14     | BQ.1.1    | 856 (2.9%)   | Passed    | Omicron5     |
| December | 22069647 | 21,58     | BQ.1.1    | 409 (1.4%)   | Passed    | Omicron5     |
| December | 22072528 | 21,4      | CK.2.1.1  | 508 (1.7%)   | Passed    | Omicron5     |
| December | 22071665 | 21,36     | XBF       | 1278 (4.3%)  | Passed    | Ricombinante |
| December | 22070685 | 21,26     | BQ.1.5    | 200 (0.7%)   | Passed    | Omicron5     |
| December | 22071158 | 21,06     | BR.3      | 1076 (3.6%)  | Passed    | Omicron2     |
| December | 22071675 | 21,03     | BQ.1.1.18 | 400 (1.3%)   | Passed    | Omicron5     |
| December | 22071634 | 20,98     |           |              |           |              |
| December | 22070772 | 20,73     | BF.7      | 656 (2.2%)   | Passed    | Omicron5     |
| December | 22071618 | 20,48     | BQ.1.1    | 347 (1.2%)   | Passed    | Omicron5     |
| December | 22071650 | 20,36     | BQ.1      | 254 (0.9%)   | Passed    | Omicron5     |
| December | 22070684 | 20,11     | BQ.1.1    | 373 (1.3%)   | Passed    | Omicron5     |
| December | 22071666 | 19,93     | BQ.1.1    | 635 (2.1%)   | Passed    | Omicron5     |
| December | 22072836 | 19,8      | XBB.1.4   | 558 (1.9%)   | Passed    | Ricombinante |
| December | 22070779 | 19,73     | BF.7      | 357 (1.2%)   | Passed    | Omicron5     |
| December | 22070188 | 19,65     | XBB.1.4   | 481 (1.6%)   | Passed    | Ricombinante |
| December | 22072525 | 19,62     | BQ.1      | 673 (2.3%)   | Passed    | Omicron5     |
| December | 22071632 | 19,6      |           |              |           |              |
| December | 22071619 | 19,59     | BQ.1.1    | 509 (1.7%)   | Passed    | Omicron5     |
| December | 22072559 | 19,38     | BQ.1.8    | 849 (2.8%)   | Passed    | Omicron5     |
| December | 22071625 | 19,26     | XBF       | 917 (3.1%)   | Passed    | Ricombinante |
| December | 22071626 | 19,2      | BF.7      | 860 (2.9%)   | Passed    | Omicron5     |
| December | 22072835 | 18,98     | BQ.1.10.1 | 207 (0.7%)   | Passed    | Omicron5     |
| December | 22070771 | 18,92     | BF.7      | 489 (1.6%)   | Passed    | Omicron5     |
| December | 22071649 | 18,85     | BQ.1.1.31 | 583 (2.0%)   | Passed    | Omicron5     |
| December | 22070682 | 18,47     | BQ.1.1.18 | 280 (0.9%)   | Passed    | Omicron5     |
| December | 22071642 | 18,42     | BF.7.1    | 241 (0.8%)   | Passed    | Omicron5     |
| December | 22070187 | 18,35     | BF.7      | 627 (2.1%)   | Passed    | Omicron5     |
| December | 22071647 | 18,34     | BF.7      | 701 (2.3%)   | Passed    | Omicron5     |
| December | 22071645 | 18,18     | BQ.1.8    | 259 (0.9%)   | Passed    | Omicron5     |
| December | 22070186 | 18,17     | BQ.1.1    | 387 (1.3%)   | Passed    | Omicron5     |
| December | 22071622 | 18,13     | XBF       | 536 (1.8%)   | Passed    | Ricombinante |
| December | 22071636 | 18,13     |           |              |           |              |
| December | 22071631 | 18,04     |           |              |           |              |
| December | 22071653 | 17,72     | BQ.1.13.1 | 592 (2.0%)   | Passed    | Omicron5     |
| December | 22070686 | 17,7      | BQ.1.5    | 221 (0.7%)   | Passed    | Omicron5     |
| December | 22069645 | 17,63     | BF.7      | 579 (1.9%)   | Passed    | Omicron5     |
| December | 22071664 | 17,39     | BA.5.1.5  | 256 (0.9%)   | Passed    | Omicron5     |
| December | 22070774 | 17,29     | BN.1.3.1  | 867 (2.9%)   | Passed    | Omicron2     |
| December | 22071657 | 16,99     | XBF       | 604 (2.0%)   | Passed    | Ricombinante |
| December | 22070683 | 16,95     | BQ.1.1    | 525 (1.8%)   | Passed    | Omicron5     |
| December | 22071611 | 16,88     | BQ.1.1    | 170 (0.6%)   | Passed    | Omicron5     |
| December | 22071620 | 16,66     | BA.5.1    | 3157 (10.8%) | Failed    | Omicron5     |

|          |          |       |           |            |        |              |
|----------|----------|-------|-----------|------------|--------|--------------|
| December | 22069644 | 16,37 | BQ.1.1.4  | 72 (0.2%)  | Passed | Omicron5     |
| December | 22072523 | 16,35 | BQ.1.1    | 385 (1.3%) | Passed | Omicron5     |
| December | 22071613 | 16,24 | BF.7      | 306 (1.0%) | Passed | Omicron5     |
| December | 22072837 | 16,21 | BN.1.2    | 360 (1.2%) | Passed | Omicron2     |
| December | 22070190 | 16,13 | XBB.1     | 69 (0.2%)  | Passed | Ricombinante |
| December | 22071615 | 16,04 | XBB.1.4   | 355 (1.2%) | Passed | Ricombinante |
| December | 22070688 | 15,97 | BN.1.3.1  | 660 (2.2%) | Passed | Omicron2     |
| December | 22070441 | 15,62 | BQ.1.1.18 | 74 (0.2%)  | Passed | Omicron5     |
| December | 22071624 | 15,6  | BQ.1.1    | 216 (0.7%) | Passed | Omicron5     |
| December | 22071635 | 15,56 |           |            |        |              |
| December | 22070785 | 15,49 | BN.1.3    | 399 (1.3%) | Passed | Omicron2     |
| December | 22071639 | 15,49 |           |            |        |              |
| December | 22071643 | 15,19 | BQ.1.8    | 345 (1.2%) | Passed | Omicron5     |
| December | 22071640 | 15,03 | BF.7.1    | 310 (1.0%) | Passed | Omicron5     |
| December | 22070446 | 14,86 | BQ.1.1    | 202 (0.7%) | Passed | Omicron5     |
| December | 22072522 | 14,85 | BA.5.2.63 | 97 (0.3%)  | Passed | Omicron5     |
| December | 22071676 | 14,64 | BA.5.1    | 74 (0.2%)  | Passed | Omicron5     |
| December | 22070201 | 14,46 | BN.1.3.1  | 359 (1.2%) | Passed | Omicron2     |
| December | 22072532 | 13,99 | BR.3      | 343 (1.1%) | Passed | Omicron2     |
| December | 22071648 | 13,96 | BQ.1.1.53 | 68 (0.2%)  | Passed | Omicron5     |
| December | 22071617 | 13,67 | BN.1.3.1  | 359 (1.2%) | Passed | Omicron2     |
| December | 22070194 | 13,54 | BQ.1.1    | 68 (0.2%)  | Passed | Omicron5     |
| December | 22070192 | 13,29 | BF.7.4.2  | 74 (0.2%)  | Passed | Omicron5     |
| December | 22071637 | 12,58 |           |            |        |              |
| December | 22072833 | 12,09 | XBF       | 343 (1.1%) | Passed | Ricombinante |
| December | 22069640 | 11,34 | BF.7.12   | 104 (0.3%) | Passed | Omicron5     |
| December | 22071659 | 11,28 | BQ.1.1.47 | 69 (0.2%)  | Passed | Omicron5     |
| December | 22071638 | 11,2  |           |            |        |              |
| December | 22069641 | 10,45 | BQ.1.1    | 70 (0.2%)  | Passed | Omicron5     |
